# Supplementary material for: Non-Covalent Binding of Tripeptides-Containing Tryptophan to Polynucleotides and Photochemical Deamination of Modified Tyrosine to Quinone Methide Leading to Covalent Attachment
Source: MDPI journal article supplement (doi:10.3390/molecules26144315), 2021-07-16
Supplement: s1 [file s1]

## Electronic supporting information

for

### **Noncovalent binding of tripeptides containing tryptophan to polynucleotides and photochemical deamination of modified tyrosine to quinone methide leading to covalent attachment**

Antonija Erben,<sup>a</sup> Igor Sviben,<sup>a</sup> Branka Mihaljević,<sup>b</sup> Ivo Piantanida,<sup>a</sup> Nikola Basarić<sup>a\*</sup>

<sup>a</sup> Department of Organic Chemistry and Biochemistry, Ruđer Bošković Institute, Bijenička cesta 54, 10 000 Zagreb, Croatia. Fax: + 385 1 4680 195; Tel: +385 1 4680 196

<sup>b</sup> Department of Material Chemistry, Ruđer Bošković Institute, Bijenička cesta 54, 10 000 Zagreb

Corresponding author's E-mail address: nbasarić@irb.hr

#### Content:

|                                                                                             |     |
|---------------------------------------------------------------------------------------------|-----|
| 1. Synthetic procedure for the preparation of known compounds (Eqs S1-S5, Tables S1 and S2) | S2  |
| 2. UV-vis and fluorescence data (Figs S1-S10, Eq S6 and S7)                                 | S9  |
| 3. Laser flash photolysis (Figs S11-S35)                                                    | S14 |
| 4. Non-covalent binding to polynucleotides (Figs S38-S54, Table S3, Eq S8)                  | S25 |
| 5. Covalent binding to oligonucleotides (Fig S55-S75 and Table S4)                          | S35 |
| 6. NMR spectra                                                                              | S46 |
| 7. References                                                                               | S61 |

## 1. Synthetic procedure for the preparation of known compounds

### ***N*-Boc-L-Tyr[CH<sub>2</sub>N(CH<sub>3</sub>)<sub>2</sub>]-OBn<sup>1</sup>**

A flask was charged with *N*-Boc-L-Tyr-OBn (1.11 g, 3.0 mmol) dissolved in CH<sub>2</sub>Cl<sub>2</sub> (150 mL). To the reaction mixture, K<sub>2</sub>CO<sub>3</sub> (0.21 g, 1.5 mmol) and Eschenmoser's salt (0.28 g, 3.0 mmol) were added and the reaction was stirred at rt for 5 days. When the reaction was finished, the reaction mixture was filtered through a sinter funnel, and from the filtrate the solvent was removed on a rotary evaporator. The product was purified by column chromatography on aluminum oxide (III) using 0→5% CH<sub>3</sub>OH in CH<sub>2</sub>Cl<sub>2</sub> to afford the pure product (0.72 g, 56 %) in the form of colorless crystals.

<sup>1</sup>H NMR (CD<sub>3</sub>OD, 300 MHz) δ/ppm: 7.35-7.22 (m, 5H), 6.91 (dd, *J*= 1.6, 8.0 Hz, 1H), 6.84 (d, *J*= 1.6 Hz, 1H), 6.64 (d, *J*= 8.0 Hz, 1H), 5.12 (d, *J*= 12.0 Hz, 1H), 5.06 (d, *J*= 12.0 Hz, 1H), 4.37-4.23 (m, 1H), 3.53 (s, 2H), 2.96 (dd, *J*= 6.4, 13.6 Hz, 1H), 2.84 (dd, *J*= 13.6, 8.0 Hz, 1H), 2.26 (s, 6H), 1.38 (s, 9H); <sup>13</sup>C NMR (CD<sub>3</sub>OD, 75 MHz) δ/ppm: 173.7 (s, 1C), 157.8 (s, 1C), 157.7 (s, 1C), 137.1 (s, 1C), 131.1 (d, 2C), 130.5 (d, 3C), 129.5 (d, 1C), 129.3 (d, 1C), 128.6 (s, 1C), 123.5 (s, 1C), 116.6 (d, 1C), 80.6 (s, 1C), 67.8 (t, 1C), 62.4 (t, 1C), 56.9 (d, 1C), 44.7 (q, 2C), 37.9 (t, 1C), 28.6 (q, 3C).

### **TFA×H-L-Tyr[CH<sub>2</sub>N(CH<sub>3</sub>)<sub>2</sub>×TFA]-OBn<sup>1</sup>**

*N*-Boc-L-Tyr[CH<sub>2</sub>N(CH<sub>3</sub>)<sub>2</sub>]-OBn (335 mg, 0.8 mmol) was dissolved in CH<sub>2</sub>Cl<sub>2</sub> (3 mL). TFA/CH<sub>2</sub>Cl<sub>2</sub> (1:1, 4 mL) was added and the reaction mixture was stirred at rt 2 h. The solvent was removed by distillation in vacuum to afford oily product quantitatively.

<sup>1</sup>H NMR (CD<sub>3</sub>OD, 300 MHz) δ/ppm: 7.41-7.28 (m, 5H), 7.14-7.09 (m, 2H), 6.86 (d, *J*= 8.8 Hz, 1H), 5.26 (d, *J*= 11.5 Hz, 1H), 5.20 (d, *J*= 11.5 Hz, 1H), 4.31 (dd (t), *J*= 7.0 Hz), 4.22 (d, *J*= 12.9 Hz, 1H), 4.13 (d, *J*= 12.9 Hz, 1H), 3.15 (d, *J*= 7.5 Hz, 2H), 2.79 (d, *J*= 7.5 Hz, 6H); <sup>13</sup>C NMR (CD<sub>3</sub>OD, 75 MHz) δ/ppm: 169.9 (s, 1C), 157.5 (s, 1C), 136.2 (s, 1C), 134.4 (d, 1C), 134.0 (d, 1C), 129.9 (d, 1C), 129.8 (d, 2C), 129.7 (d, 2C), 126.6 (s, 1C), 118.0 (s, 1C), 117.0 (d, 1C), 69.3 (t, 1C), 58.2 (t, 1C), 55.2 (d, 1C), 43.2 (q, 2C), 36.5 (t, 1C).

### ***N*-Boc-L-Trp-OSu<sup>2</sup>**

*N*-Boc-L-Trp (5.00 g, 16.4 mmol), *N*-hydroxysuccinimide (NHS, 2.07 g, 18.0 mmol) and *N,N'*-dicyclohexylcarbodiimide (DCC, 3.72 g, 18.0 mmol) were dissolved in CH<sub>2</sub>Cl<sub>2</sub> (40 mL). The reaction mixture was stirred for 2 h and cooled by an ice bath, and after that kept in a refrigerator overnight. The precipitate was filtered off and the solvent was removed on a rotary evaporator.

The residue was suspended in EtOAc (100 mL) and left to stand in a refrigerator. After filtration, the solution was washed with aqueous Na<sub>2</sub>CO<sub>3</sub> (0.5 M, 100 mL), HCl (0.5 M, 100 mL) and water (100 mL). The organic solution was dried over anhydrous MgSO<sub>4</sub>, filtered and the solvent was removed on a rotary evaporator to afford yellowish product (6.07 g, 89%), which was used in the next step without purification.

<sup>1</sup>H NMR (CD<sub>3</sub>OD, 300 MHz)  $\delta$ /ppm: 7.58 (d,  $J$  = 7.5 Hz, 1H), 7.33 (d,  $J$  = 8.0 Hz, 1H), 7.22 (br. s, 1H), 7.10 (dd (t),  $J$  = 8.0 Hz, 1H), 7.03 (dd (t),  $J$  = 8.0 Hz, 1H), 4.80 (dd,  $J$  = 5.0, 8.0 Hz, 1H), 3.47 (dd,  $J$  = 5.0, 14.7 Hz, 1H), 3.22 (dd,  $J$  = 8.0, 14.7 Hz, 1H), 2.84 (s, 4H), 1.36 (s, 9H).

### ***N*-Boc-L-Trp- L-Trp-OH<sup>3</sup>**

A solution of *N*-Boc-L-Trp-OSu (2.21 g, 5.5 mmol) in THF (25 mL) was added slowly to the suspension of L-Trp (1.02 g, 5.0 mmol) and NaHCO<sub>3</sub> (0.84 g, 10.0 mmol) in a mixture of THF and H<sub>2</sub>O (1:1, 48 mL). The reaction mixture was stirred at rt for 3 days. THF was removed on a rotary evaporator and the aqueous residue acidified with HCl (0.5 M) to pH 2-3. An extraction with EtOAc (3×50 mL) was carried out, the extracts were dried over anhydrous Na<sub>2</sub>SO<sub>4</sub>, filtered and the solvent was removed on a rotary evaporator to afford product in the form of colorless solid (2.34 g, 95%).

<sup>1</sup>H NMR (CD<sub>3</sub>OD, 300 MHz)  $\delta$ /ppm: 7.57 (d,  $J$  = 7.9 Hz, 1H), 7.32 (dd (t),  $J$  = 7.9 Hz, 3H), 7.13-6.96 (m, 5H), 6.90 (dd (t),  $J$  = 6.5 Hz 1H), 4.77-4.67 (m, 1H), 4.37-4.27 (m, 1H), 3.25-3.13 (m, 3H), 3.09-2.97 (m, 1H), 1.28 (s, 9H); <sup>13</sup>C NMR (CD<sub>3</sub>OD, 75 MHz)  $\delta$ /ppm: 174.9 (s, 1C), 174.4 (s, 1C), 157.4 (s, 1C), 138.1 (s, 1C), 137.9 (s, 1C), 128.9 (s, 1C), 128.8 (s, 1C), 124.7 (d, 1C), 124.5 (d, 1C), 122.42 (d, 1C), 122.40 (d, 1C), 119.85 (d, 1C), 119.81 (d, 1C), 119.4 (d, 1C), 119.2 (d, 1C), 112.3 (d, 1C), 112.2 (d, 1C), 110.9 (s, 1C), 110.4 (s, 1C), 80.7 (s, 1C), 56.7 (d, 1C), 54.6 (d, 1C), 28.9 (t, 1C), 28.5 (q, 3C), 28.3 (t, 1C).

### ***N*-Boc-L-Trp-L-Trp-OSu<sup>2</sup>**

*N*-Boc-L-Trp-L-Trp (0.96 g, 2.0 mmol), NHS (0.25 g, 2.2 mmol) and DCC (0.34 g, 2.2 mmol) were dissolved in CH<sub>2</sub>Cl<sub>2</sub> (15 mL). The reaction mixture was stirred for 2 h and cooled by an ice bath, and after that kept in a refrigerator overnight. The reaction mixture was washed with aqueous Na<sub>2</sub>CO<sub>3</sub> (0.5 M, 75 mL), HCl (0.5 M, 75 mL) and water (75 mL). The organic solution was dried over anhydrous Na<sub>2</sub>SO<sub>4</sub>, filtered and the solvent was removed on a rotary evaporator to afford product in the form of colorless solid (0.70 g, 60%), which was used in the next step without purification.

$^1\text{H}$  NMR ( $\text{CD}_3\text{OD}$ , 300 MHz)  $\delta/\text{ppm}$ : 7.55 (d,  $J = 7.7$  Hz, 1H), 7.37-7.26 (m, 2H), 7.20 (br. s, 1H), 7.14-6.80 (m, 6H), 5.13 (dd (t),  $J = 6.1$  Hz, 1H), 4.37-4.25 (m, 1H), 3.35-3.00 (m, 4H), 2.81 (s, 4H), 1.25 (s, 9H).

### Synthesis of tripeptides – general procedure

A solution of *N*-Boc-L-Trp-L-Trp-OSu (387 mg, 0.65 mmol) in THF-u (6 mL) was added slowly to a suspension of the salt  $\text{TFA} \times \text{H-L-Tyr-OBn}$  or  $\text{TFA} \times \text{H-L-Phe-OBn}$  (0.6 mmol) and  $\text{NaHCO}_3$  (252 mg, 3.0 mmol) in a mixture of THF and  $\text{H}_2\text{O}$  (1:1, 12 mL). The reaction mixture was stirred at rt over 3 days. THF was removed on a rotary evaporator and the aqueous residue was acidified by HCl (0.5 M) to the pH value of 2-3. The extraction with EtOAc ( $3 \times 50$  mL) was carried out and the extracts were dried over anhydrous sodium sulfate. After filtration, the solvent was removed on a rotary evaporator and the crude residue was purified on a column of silica gel using  $\text{CH}_3\text{OH}/\text{CH}_2\text{Cl}_2$  (1 $\rightarrow$ 20%) as eluent to afford the pure oily product.

### *N*-Boc-L-Trp- L-Trp-L-Phe-OBn (1)<sup>3</sup>

Prepared according to the general procedure from *N*-Boc-L-Trp-L-Trp-OH (387 mg, 0.65 mmol) and  $\text{TFA} \times \text{H-L-Phe-OBn}$  (0.24 g, 0.6 mmol). After column chromatography, the oily product was obtained (0.25 g, 30%).

$^1\text{H}$  NMR ( $\text{CD}_3\text{OD}$ , 300 MHz)  $\delta/\text{ppm}$ : 7.56 (d,  $J = 8.0$  Hz, 1H), 7.36 (d,  $J = 8.4$  Hz, 1H), 7.33-7.26 (m, 4H), 7.24-7.18 (m, 2H), 7.18-7.12 (m, 4H), 7.12-7.07 (m, 2H), 7.05-6.97 (m, 4H), 6.93-6.86 (m, 1H), 6.82 (br. s, 1H), 5.04 (d,  $J = 12.0$  Hz, 1H), 4.98 (d,  $J = 12.0$  Hz, 1H), 4.61-4.52 (m, 2H), 4.23 (dd (t),  $J = 5.6$  Hz, 1H), 3.18-3.02 (m, 3H), 2.97-2.87 (m, 1H), 2.83-2.67 (m, 2H), 1.22 (s, 9H);  $^{13}\text{C}$  NMR ( $\text{CD}_3\text{OD}$ , 150 MHz)  $\delta/\text{ppm}$ : 174.3 (s, 1C), 173.4 (s, 1C), 172.1 (s, 1C), 138.1 (s, 1C), 138.0 (s, 1C), 137.7 (s, 1C), 137.0 (s, 1C), 130.2 (d, 2C), 129.5 (d, 4C), 129.4 (d, 2C), 129.3 (d, 1C), 128.9 (s, 1C), 128.8 (s, 1C), 127.9 (d, 1C), 124.9 (d, 1C), 124.8 (d, 1C), 122.6 (d, 1C), 122.5 (d, 1C), 120.0 (d, 2C), 119.5 (d, 1C), 119.2 (d, 1C), 112.4 (d, 2C), 110.7 (s, 1C), 110.0 (s, 1C), 80.9 (s, 1C), 67.9 (t, 1C), 57.1 (d, 1C), 55.6 (d, 1C), 55.1 (d, 1C), 38.6 (t, 1C), 28.6 (t, 1C), 28.5 (q, 3C), 28.1 (t, 1C).

### *N*-Boc-L-Trp-L-Trp-L-Tyr-OBn (2)<sup>3</sup>

Prepared according to the general procedure from *N*-Boc-L-Trp-L-Trp-OH (387 mg, 0.65 mmol) and  $\text{TFA} \times \text{H-L-Tyr-OBn}$  (0.23 g, 0.6 mmol). After column chromatography, the oily product was obtained (0.13 g, 30%).

$^1\text{H}$  NMR ( $\text{CD}_3\text{OD}$ , 300 MHz)  $\delta/\text{ppm}$ : 7.56 (d,  $J$  = 7.8 Hz, 1H), 7.39-7.24 (m, 5H), 7.24-7.16 (m, 1H), 7.16-6.96 (m, 6H), 6.96-6.76 (m, 4H), 6.62 (d,  $J$  = 8.4 Hz, 2H), 5.03 (d,  $J$  = 13.0 Hz, 1H), 4.99 (d,  $J$  = 13.0 Hz, 1H), 4.60-4.46 (m, 2H), 4.24 (dd (t),  $J$  = 6.5 Hz, 1H), 3.19-3.02 (m, 3H), 2.87-2.65 (m, 3H), 1.22 (s, 9H);  $^{13}\text{C}$  NMR ( $\text{CD}_3\text{OD}$ , 75 MHz)  $\delta/\text{ppm}$ : 174.6 (s, 1C), 173.5 (s, 1C), 172.5 (s, 1C), 157.4 (s, 1C), 138.04 (s, 1C), 138.00 (s, 1C), 137.0 (s, 1C), 131.4 (d, 2C), 129.5 (d, 2C), 129.3 (d, 1C), 129.2 (d, 1C), 128.8 (s, 1C), 128.7 (d, 1C), 128.3 (s, 1C), 124.7 (d, 1C), 124.6 (d, 1C), 122.5 (d, 2C), 120.0 (d, 1C), 119.9 (d, 1C), 119.44 (d, 1C), 119.40 (d, 1C), 116.3 (d, 1C), 112.3 (d, 2C), 110.9 (s, 1C), 110.3 (s, 1C), 80.7 (s, 1C), 67.4 (t, 1C), 57.5 (d, 1C), 55.8 (d, 1C), 55.1 (d, 1C), 37.8 (t, 1C), 29.0 (t, 1C), 28.7 (q, 3C), 28.5 (t, 1C).

### Removal of Boc – general procedure

Tripeptide **1-3** (0.03 mmol) was dissolved in anhydrous EtOAc to which a saturated solution of HCl in EtOAc was added (5 M, 1 mL). The reaction mixture was stirred 1 h at rt and the solvent was removed in vacuum. The remaining crystals were washed with  $\text{Et}_2\text{O}$  and dried on a rotary evaporator. The product was purified by preparative TLC on silica gel using 20% MeOH/ $\text{CH}_2\text{Cl}_2$  as eluent or by semipreparative HPLC.

### HCl $\times$ H-L-Trp-L-Trp-L-Phe-OBn (1 $\times$ HCl)<sup>3</sup>

Prepared according to the general procedure from **1** (20 mg, 0.03 mmol) giving the oily product (10 mg, 55%).

$^1\text{H}$  NMR ( $\text{CD}_3\text{OD}$ , 300 MHz)  $\delta/\text{ppm}$ : 7.64 (d,  $J$  = 8.1 Hz, 1H), 7.58 (d,  $J$  = 7.8 Hz, 1H), 7.37 (dd (t),  $J$  = 8.1 Hz, 2H), 7.33-7.27 (m, 3H), 7.26-7.21 (m, 3H), 7.20-7.15 (m, 3H), 7.14-7.05 (m, 6H), 7.04-6.96 (m, 3H), 5.08 (d,  $J$  = 12.1 Hz, 1H), 5.02 (d,  $J$  = 12.1 Hz, 1H), 4.73 (dd (t),  $J$  = 7.0 Hz, 1H), 4.65 (dd,  $J$  = 6.4, 7.8 Hz, 1H), 4.07 (dd,  $J$  = 5.6, 8.7 Hz, 1H), 3.21 (dd,  $J$  = 6.4, 14.7 Hz, 1H), 3.15-3.02 (m, 3H), 2.94 (dd,  $J$  = 7.8, 13.7 Hz, 1H);  $^{13}\text{C}$  NMR ( $\text{CD}_3\text{OD}$ , 150 MHz)  $\delta/\text{ppm}$ : 173.2 (s, 1C), 172.3 (s, 1C), 169.8 (s, 1C), 138.3 (s, 1C), 138.1 (s, 1C), 137.8 (s, 1C), 136.9 (s, 1C), 130.4 (d, 1C), 129.5 (d, 3C), 129.4 (d, 1C), 128.7 (s, 1C), 128.2 (s, 1C), 127.9 (d, 1C), 125.8 (d, 1C), 124.8 (d, 1C), 122.9 (d, 1C), 122.5 (d, 1C), 120.3 (d, 1C), 119.8 (d, 1C), 119.4 (d, 1C), 119.3 (d, 1C), 119.1 (d, 1C), 112.6 (d, 1C), 112.4 (d, 1C), 110.5 (s, 1C), 107.9 (s, 1C), 68.0 (t, 1C), 55.55 (d, 1C), 55.53 (d, 1C), 54.7 (d, 1C), 38.4 (t, 1C), 29.2 (t, 1C), 28.9 (t, 1C).

### HCl $\times$ H-L-Trp-L-Trp-L-Tyr-OBn (2 $\times$ HCl)<sup>3</sup>

Prepared according to the general procedure from **2** (20 mg, 0.03 mmol) giving the oily product (11 mg, 61%).

**<sup>1</sup>H NMR** (CD<sub>3</sub>OD, 600 MHz)  $\delta$ /ppm: 7.61 (d, *J* = 8.0 Hz, 1H), 7.44 (d, *J* = 8.0 Hz, 1H), 7.36 (d, *J* = 8.0 Hz, 1H), 7.34-7.29 (m, 4H), 7.22 (dd, *J* = 1.8, 7.0 Hz, 2H), 7.11 (dd(t), *J* = 7.5 Hz 1H), 7.09-7.05 (m, 2H), 7.02 (dd(t), *J* = 7.5 Hz 1H), 6.97-6.93 (m, 2H), 6.85 (d, *J* = 8.3 Hz, 2H), 6.65 (d, *J* = 8.3 Hz, 2H), 5.05 (d, *J* = 12.0 Hz, 1H), 5.03 (d, *J* = 12.0 Hz, 1H), 4.69 (dd(t), *J* = 6.9 Hz, 1H), 4.57 (dd(t), *J* = 7.0 Hz, 1H), 3.85 (dd(t), *J* = 6.5 Hz, 1H), 3.21 (dd, *J* = 5.5, 14.6 Hz, 1H), 3.10-3.00 (m, 4H), 2.91 (dd, *J* = 6.5, 14.0 Hz, 1H), 2.82 (dd, *J* = 7.4, 14.0 Hz, 1H); **<sup>13</sup>C NMR** (CD<sub>3</sub>OD, 150 MHz)  $\delta$ /ppm: 176.2 (s, 1C), 173.5 (s, 1C), 172.4 (s, 1C), 157.4 (s, 1C), 138.2 (s, 1C), 138.0 (s, 1C), 131.4 (d, 2C), 129.52 (d, 2C), 129.51 (d, 2C), 129.3 (d, 1C), 128.85 (s, 1C), 128.83 (s, 1C), 128.2 (s, 1C), 125.0 (d, 1C), 124.8 (d, 1C), 122.6 (d, 1C), 122.4 (d, 1C), 120.0 (d, 1C), 119.8 (d, 1C), 119.5 (d, 1C), 119.4 (d, 1C), 116.3 (d, 1C), 112.4 (d, 1C), 112.3 (d, 1C), 110.6 (s, 1C), 110.3 (s, 1C), 67.9 (t, 1C), 56.1 (d, 1C), 55.5 (d, 1C), 55.0 (d, 1C), 37.7 (t, 1C), 31.1 (t, 1C), 28.8 (t, 1C).

## HPLC analysis and separation

Analysis of the samples was performed by HPLC on a Phenomenex Luna C18

Table S1. The following method was used:

| <i>t</i> / min | B (%) |
|----------------|-------|
| 0              | 100   |
| 10             | 100   |
| 20             | 0     |
| 30             | 0     |

A: CH<sub>3</sub>OH, 100 %

B: CH<sub>3</sub>OH-H<sub>2</sub>O (1:1 v/v) + TFA, 0.1%

Flow rate: 1 mL/ min.

Semipreparative HPLC separation on a Phenomenex Jupiter C18 5 $\mu$  300A column

Table S2. The following method was used:

| $t$ / min | B (%) |
|-----------|-------|
| 0         | 100   |
| 20        | 100   |
| 40        | 0     |
| 60        | 0     |

A: CH<sub>3</sub>OH, 100 %

B: CH<sub>3</sub>OH-H<sub>2</sub>O (1:1 v/v) + TFA, 0.1%

Flow rate: 1 mL/ min.

### **Determination of the quantum yield of photomethanolysis**

The **number of absorbed photons for the KIO<sub>3</sub>/KI** was calculated from:

$$n(\text{absorbed photons}) = \frac{\Delta A_{352} \times V_{\text{irr}}}{\epsilon_{352} \times \ell \times \Phi_{\text{lit.}}} \quad (\text{S1})$$

where:

$\Delta A_{352}$  absorbance difference at 352 nm for the irradiated and non-irradiated sample

$V_{\text{irr}}$  volume of the solution which was irradiated

$\epsilon_{352}$  molar absorption coefficient for I<sub>3</sub><sup>-</sup> in solution which contains iodides and iodates, 27600 M<sup>-1</sup> cm<sup>-1</sup>

$\ell$  length of the optical path (1 cm in all experiments)

$\Phi_{\text{lit.}}$  quantum yield ( $\Phi_{254} \approx 0.74$ ), the precise value was calculated from S2 and S3 (depending on the iodine concentration and temperature)

$$c(\text{I}^-) = A_{300} / 1.061 \quad [\text{M}] \quad (\text{S2})$$

$$\Phi_{\text{lit}} = 0.75 \times [1 + 0.02(T - 20.7)] \times [1 + 0.23(c(\text{I}^-) - 0.577)] \quad (\text{S3})$$

**For the absorbances in the range 0.4-0.8 the number of absorbed photons was calculated according to:**

$$n(\text{absorbed photons}) = n(\text{total photons}) \times (1-T) \quad (\text{S4})$$

**The quantum yield for the photohydrolysis was calculated according to:**

$$\Phi = \frac{A_{254} \cdot V_{\text{irr}} \cdot x(\text{photoproduct})_{\text{HPLC}}}{\epsilon_{254} \cdot \ell \cdot n(\text{total photons}) \cdot (1 - T_{254})} \quad (\text{S5})$$

where:

$x(\text{photoproduct})_{\text{HPLC}}$  conversion of reactant to photoproduct determined by HPLC

$T_{254}$  transmittance of light at 254 nm



## 2. UV-vis and fluorescence data

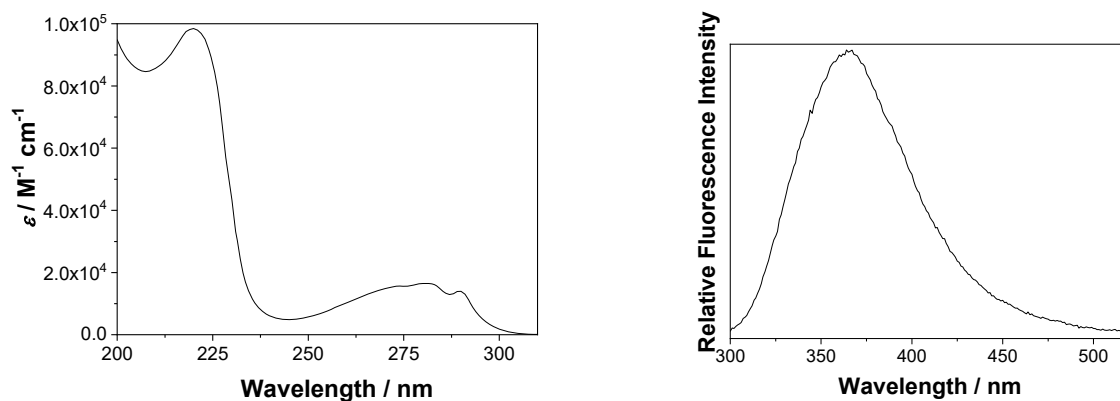

Fig. S1. Absorption spectrum (left) and emission spectrum ( $\lambda_{\text{ex}} = 280 \text{ nm}$ ) of **1** in  $\text{CH}_3\text{CN}$ .

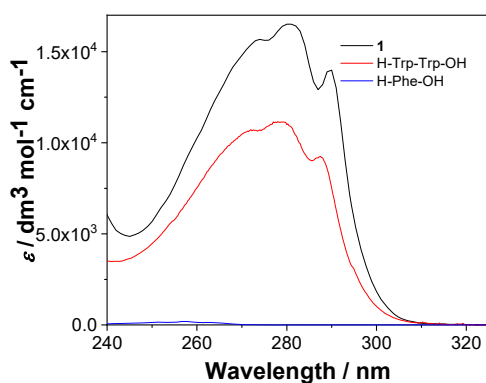

Fig. S2. Comparison of the absorptivity of **1** with the one of H-L-Trp-L-Trp-OH and H-L-Phe-OH from literature.<sup>4</sup>

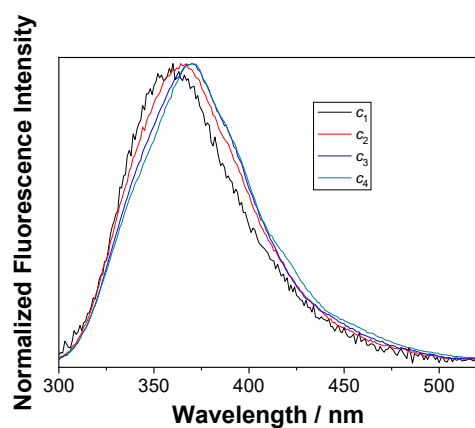

Fig. S3. Dependence of the normalized fluorescence spectra ( $\lambda_{\text{ex}} = 280 \text{ nm}$ ) of **1** ( $5 \times 10^{-7}$  -  $2 \times 10^{-6} \text{ M}$ ), in aqueous solution in the presence of sodium cacodylate buffer (pH 7.0, 50 mM).

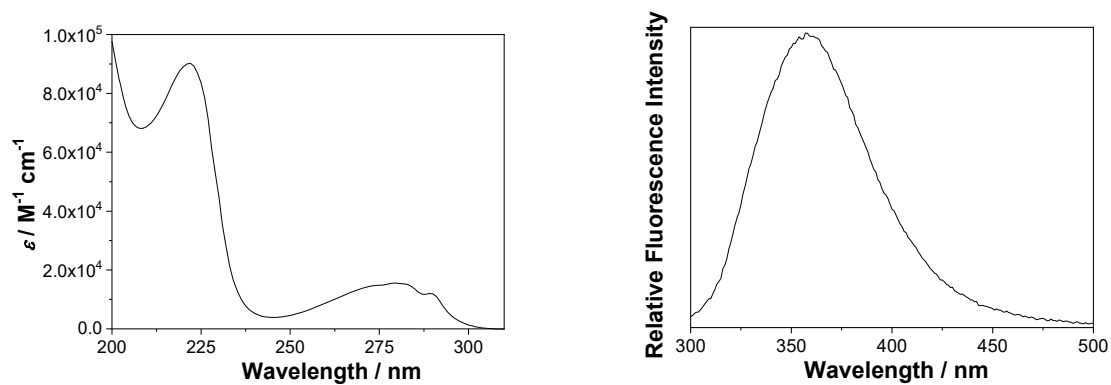

Fig. S4. Absorption spectrum (left) and emission spectrum ( $\lambda_{\text{ex}} = 280$  nm) of **2** in  $\text{CH}_3\text{CN}$ .

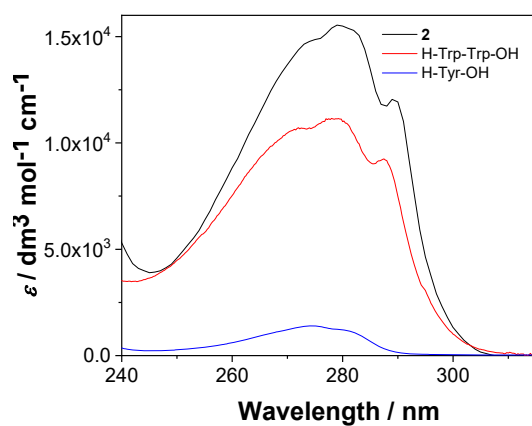

Fig. S5. Comparison of the absorptivity of **2** with the one of H-L-Trp-L-Trp-OH and H-L-Tyr-OH from literature.<sup>5</sup>

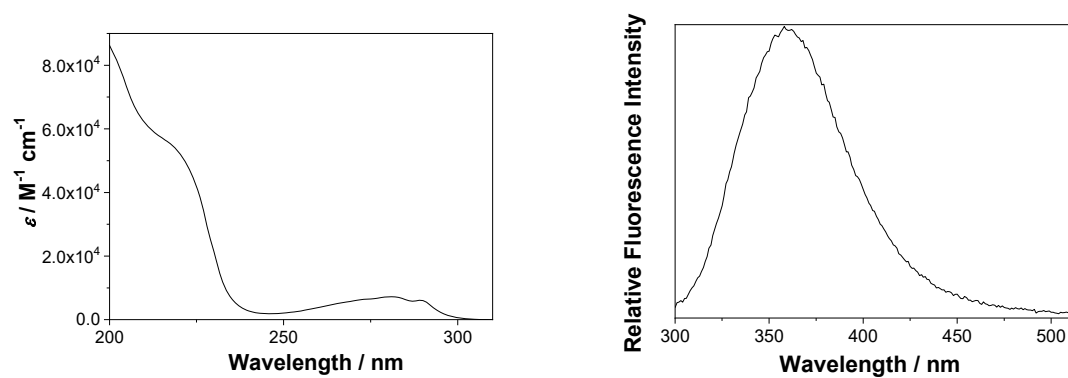

Fig. S6. Absorption spectrum (left) and emission spectrum ( $\lambda_{\text{ex}} = 280$  nm) of **3** in  $\text{CH}_3\text{CN}$ .

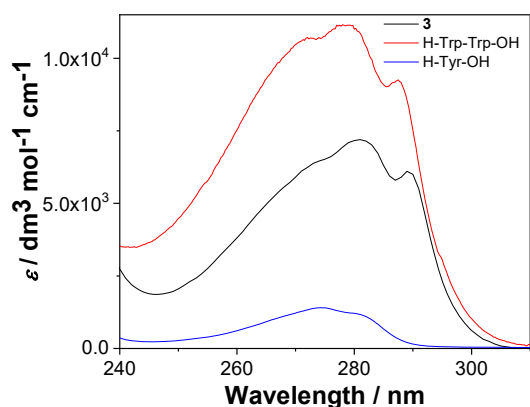

Fig. S7. Comparison of the absorptivity of **3** with the one of H-L-Trp-L-Trp-OH and H-L-Tyr-OH from literature.<sup>5</sup>

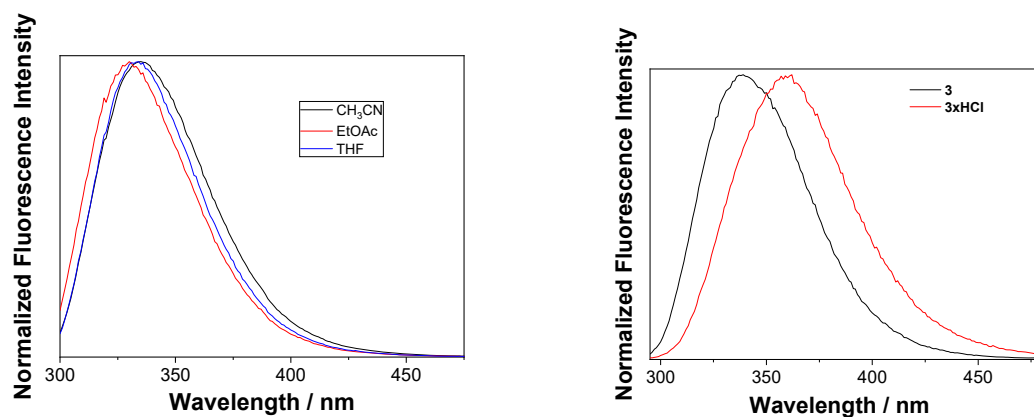

Fig. S8. Normalized fluorescence spectra ( $\lambda_{\text{ex}} = 280$  nm) of **3** in CH<sub>3</sub>CN, EtOAc and THF (left), and comparison of the fluorescence spectra of **3** in CH<sub>3</sub>CN and **3**·HCl in CH<sub>3</sub>CN-H<sub>2</sub>O (1:9), sodium cacodilate buffer (50 mM, pH = 7.0).

Fluorescence quantum yield was calculated according to:

$$\Phi_f = \Phi_{\text{Ref}} \left( \frac{n}{n_R} \right)^2 \frac{I}{I_R} \frac{1-10^{-A_R}}{1-10^{-A}} \quad (\text{S6})$$

$\Phi_f$  and  $\Phi_{\text{Ref}}$  – fluorescence quantum yield of compound and the reference;

$n$  and  $n_R$  – refractive index of the solvent in which compound or the reference was dissolved;

$A$  and  $A_R$  – absorbance of the compound and the reference at the excitation wavelength;

$I$  and  $I_R$  – area under emission curve of the compound and the reference.

Fluorescence decays were obtained with time-correlated single-photon counting method on a FS5 Edinburgh Instruments spectrometer equipped for time correlated single photon counting method (TC-SPC). Pulsed LEDs at 280 nm was used for the excitation (pulse duration  $\approx 800$  ps). Fluorescence signals were monitored over 1023 channels with the time increment of  $\approx 20$  ps/channel. The decays were collected until they reached 3000 counts in the peak channel. The histograms were analyzed by a nonlinear least-squares deconvolution method using. The quality of the fit was judged by the reduced  $\chi^2$  being close to unity and the random distribution of the weighted residuals. Fluorescence decays were fit to a sum of exponentials using the following expression:

$$F(t) = \alpha_1 \exp\left(-\frac{t}{\tau_1}\right) + \alpha_2 \exp\left(-\frac{t}{\tau_2}\right) + \alpha_3 \exp\left(-\frac{t}{\tau_3}\right) + \dots \quad (\text{S7})$$

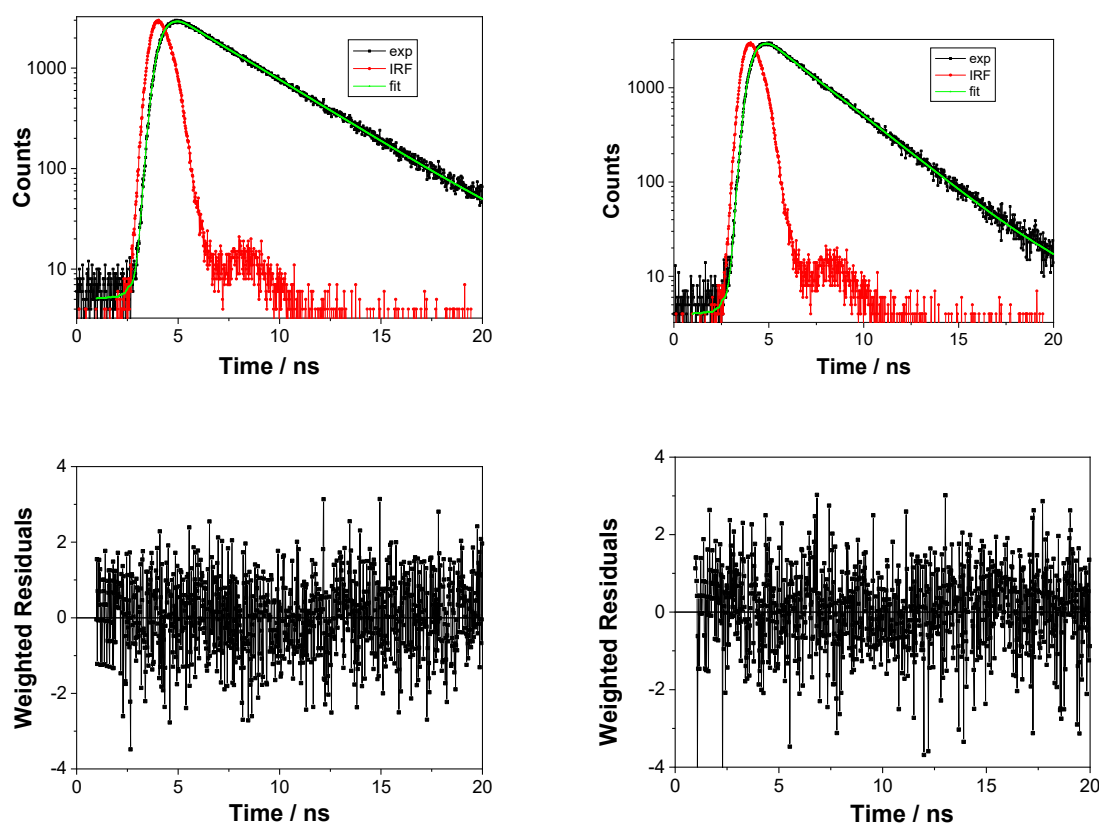

Fig. S9. Decay of fluorescence for **1** (left) and **2** (right) in CH<sub>3</sub>CN at 370 nm upon excitation at 280 nm; bottom panels show weighted residuals between the experimental and fitted values.

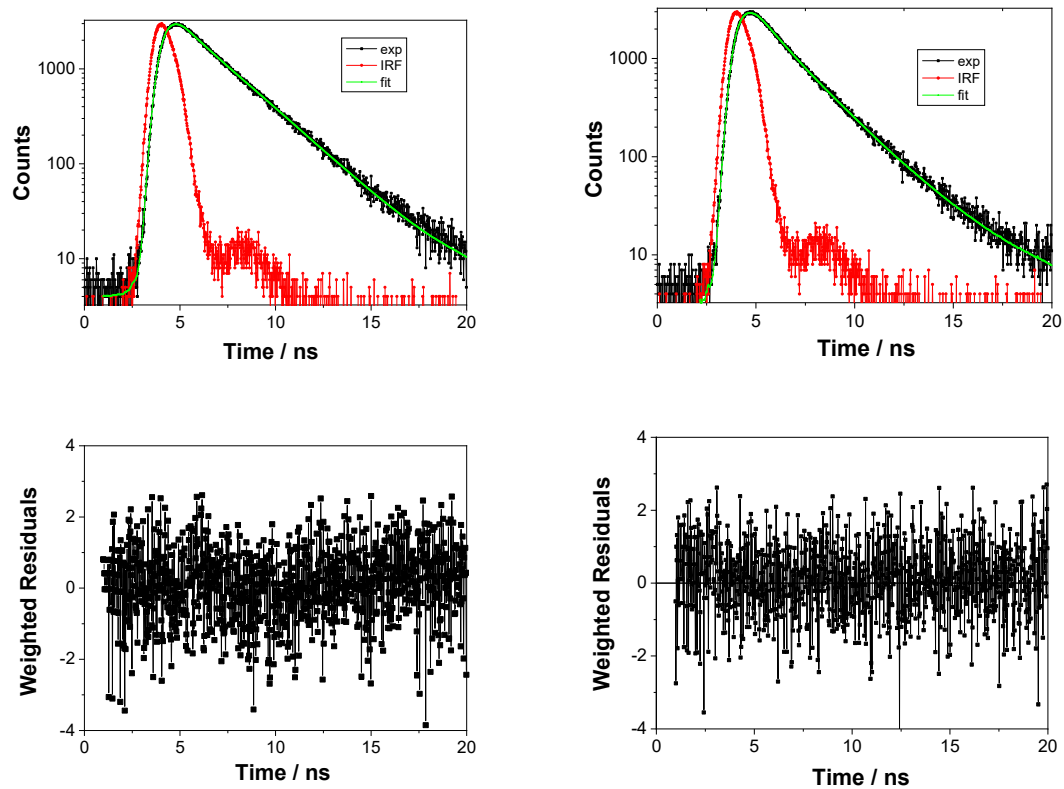

Fig. S10. Decay of fluorescence for **3** (left) in CH<sub>3</sub>CN and **3**×HCl (right) in CH<sub>3</sub>CN-H<sub>2</sub>O (1:9) at 370 nm upon excitation at 280 nm; bottom panels show weighted residuals between the experimental and fitted values.

### 3. Laser Flash Photolysis

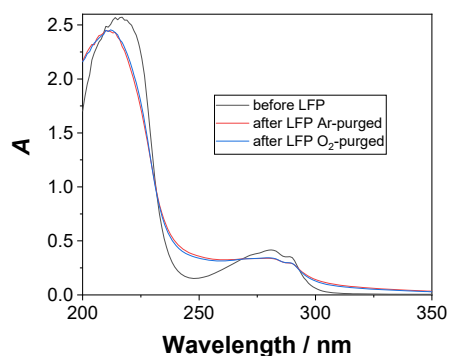

Fig. S11. UV-vis spectra of tripeptide **3** in CH<sub>3</sub>CN ( $c = 6.1 \times 10^{-5}$  M) before and after the LFP experiment.

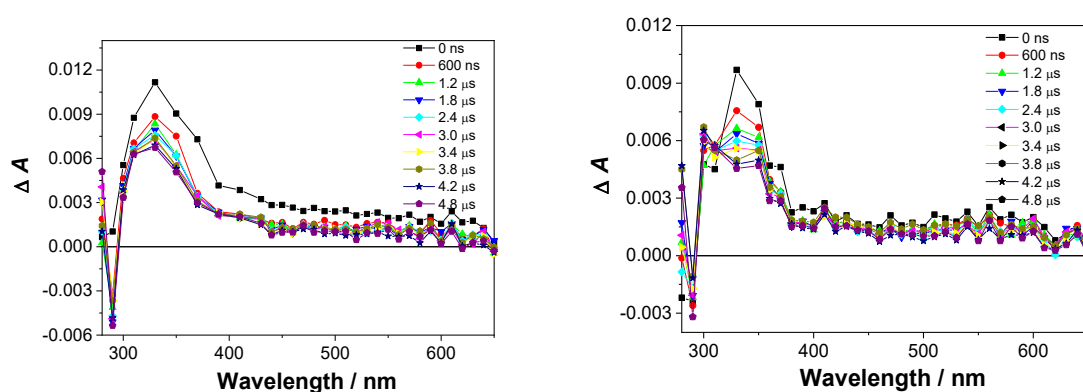

Fig. S12. Transient absorption spectra of Ar-purged (left) and O<sub>2</sub>-purged (right) solution of **3** in CH<sub>3</sub>CN ( $c = 6.1 \times 10^{-5}$  M), excited at 266 nm,  $A_{266} = 0.28$ , laser power  $\approx 18$  mJ/pulse.

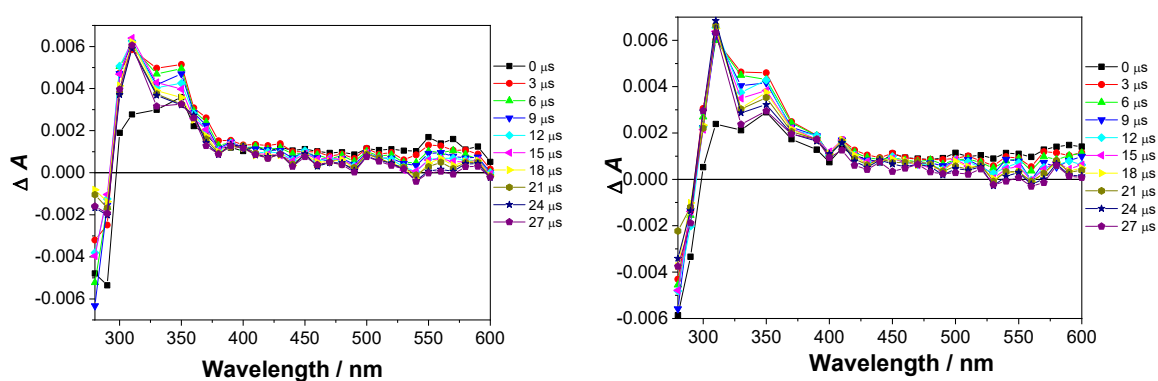

Fig. S13. Transient absorption spectra of Ar-purged (left) and O<sub>2</sub>-purged (right) solution of **3** in CH<sub>3</sub>CN ( $c = 6.1 \times 10^{-5}$  M), excited at 266 nm,  $A_{266} = 0.28$ , laser power  $\approx 18$  mJ/pulse.

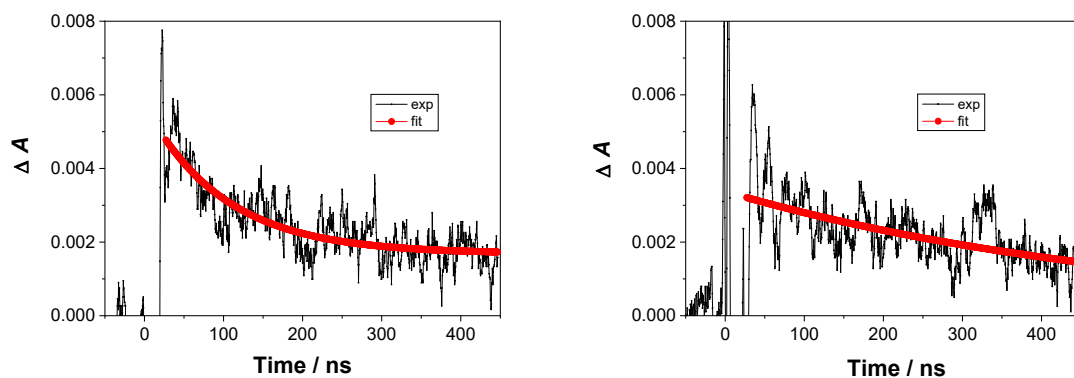

Fig. S14. Decay of transient absorption at 380 nm for Ar-purged (left) and O<sub>2</sub>-purged (right) solution of **3** in CH<sub>3</sub>CN ( $c = 6.1 \times 10^{-5}$  M), excited at 266 nm,  $A_{266} = 0.28$ .

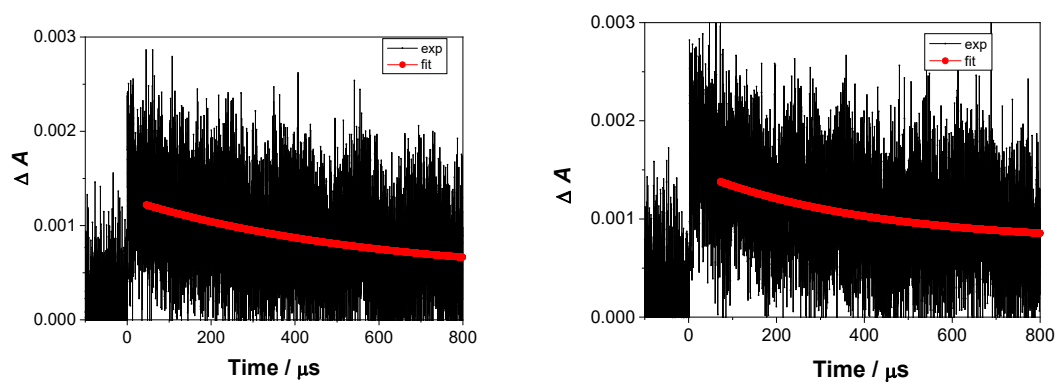

Fig. S15. Decay of transient absorption at 380 nm for Ar-purged (left) and O<sub>2</sub>-purged (right) solution of **3** in CH<sub>3</sub>CN ( $c = 6.1 \times 10^{-5}$  M), excited at 266 nm,  $A_{266} = 0.28$ .

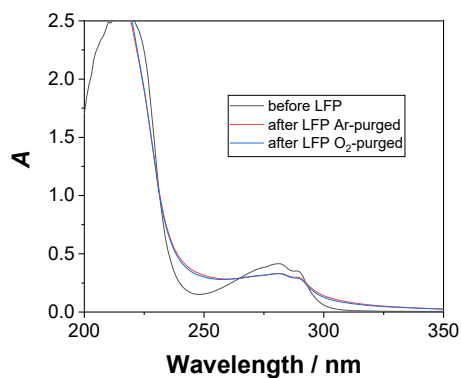

Fig. S16. UV-vis spectra of tripeptide **3** ( $c = 6.1 \times 10^{-5}$  M) in CH<sub>3</sub>CN-H<sub>2</sub>O (1:1 v/v, in the presence of phosphate buffer  $c = 50$  mM, pH = 7.0) before and after the LFP experiment.

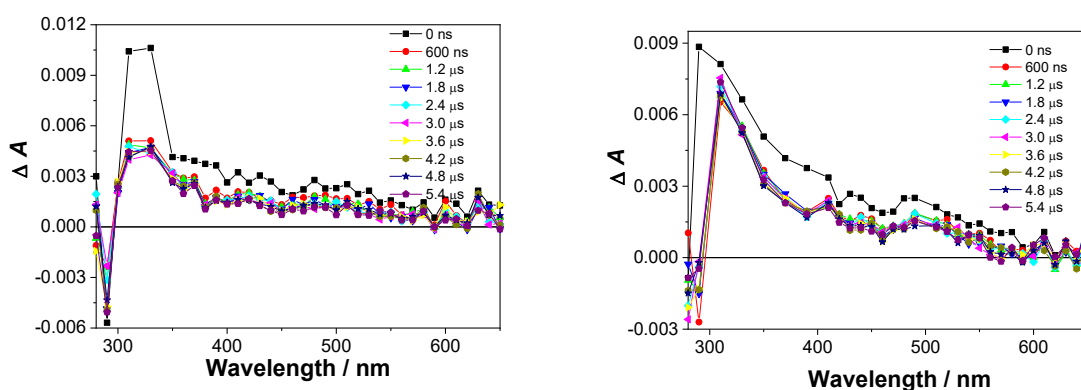

Fig. S17. Transient absorption spectra of Ar-purged (left) and O<sub>2</sub>-purged (right) solution of **3** ( $c = 6.1 \times 10^{-5}$  M) in CH<sub>3</sub>CN-H<sub>2</sub>O (1:1 v/v, in the presence of phosphate buffer  $c = 50$  mM, pH = 7.0), excited at 266 nm,  $A_{266} = 0.30$ , laser power  $\approx 18$ -19 mJ/pulse.

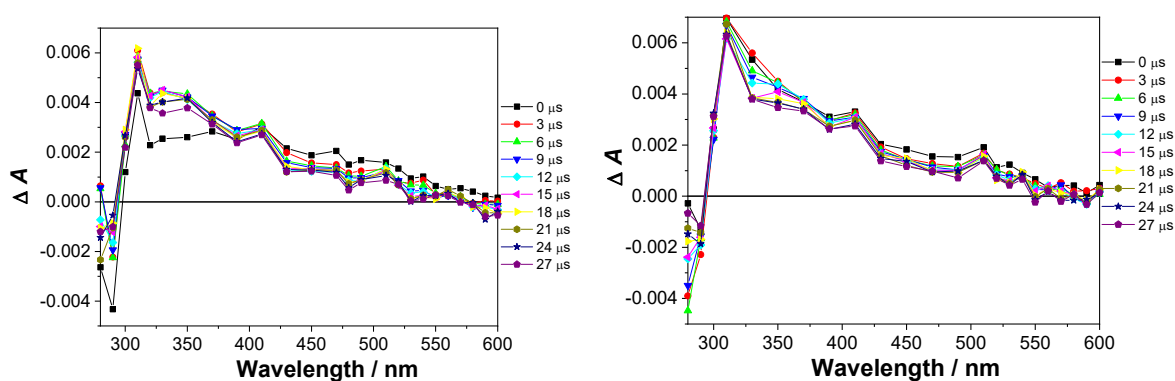

Fig. S18. Transient absorption spectra of Ar-purged (left) and O<sub>2</sub>-purged (right) solution of **3** ( $c = 6.1 \times 10^{-5}$  M) in CH<sub>3</sub>CN-H<sub>2</sub>O (1:1 v/v, in the presence of phosphate buffer  $c = 50$  mM, pH = 7.0), excited at 266 nm,  $A_{266} = 0.30$ , laser power 18-19 mJ/pulse.



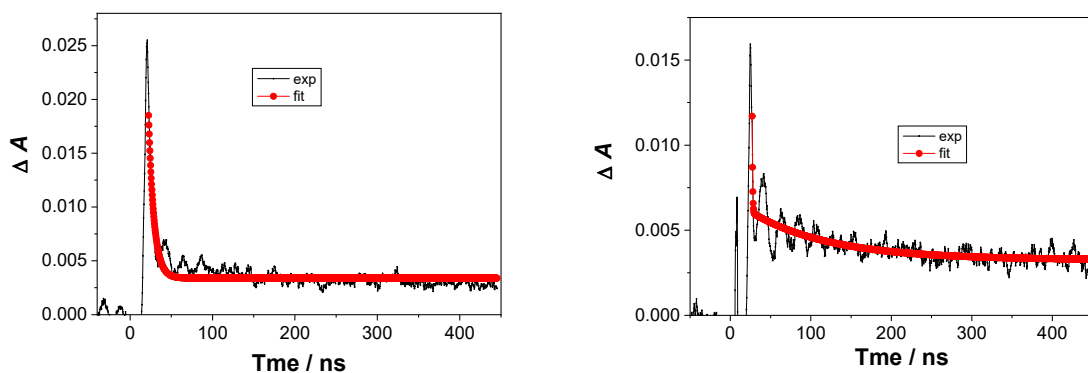

Fig. S19. Decay of transient absorption at 400 nm for Ar-purged (left) and O<sub>2</sub>-purged (right) solution of **3** ( $c = 6.1 \times 10^{-5}$  M) in CH<sub>3</sub>CN-H<sub>2</sub>O (1:1 v/v, in the presence of phosphate buffer  $c = 50$  mM, pH = 7.0), excited at 266 nm,  $A_{266} = 0.30$ .

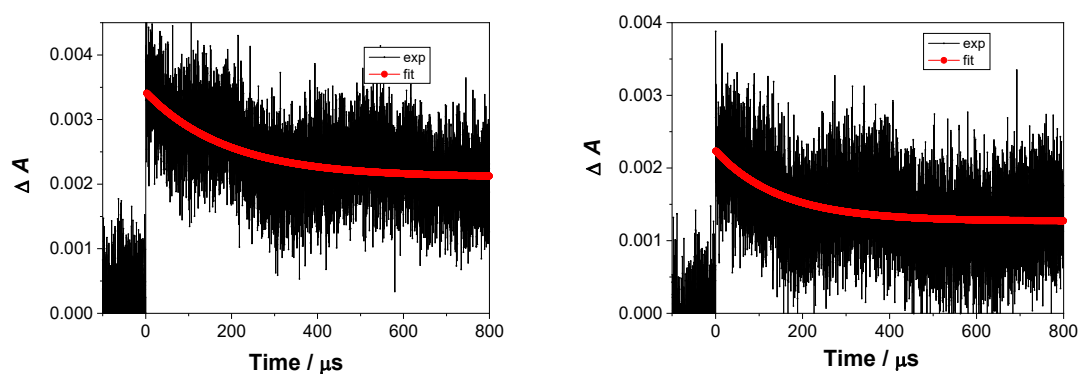

Fig. S20. Decay of transient absorption at 380 nm for Ar-purged (left) and O<sub>2</sub>-purged (right) solution of **3** ( $c = 6.1 \times 10^{-5}$  M) in CH<sub>3</sub>CN-H<sub>2</sub>O (1:1 v/v, in the presence of phosphate buffer  $c = 50$  mM, pH = 7.0), excited at 266 nm,  $A_{266} = 0.30$ .

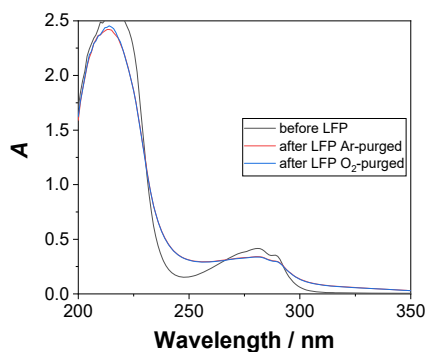

Fig. S21. UV-vis spectra of tripeptide **3**×HCl ( $c = 9.5 \times 10^{-5}$  M) in CH<sub>3</sub>CN-H<sub>2</sub>O (1:1 v/v, in the presence of phosphate buffer  $c = 50$  mM, pH = 7.0) before and after the LFP experiment.

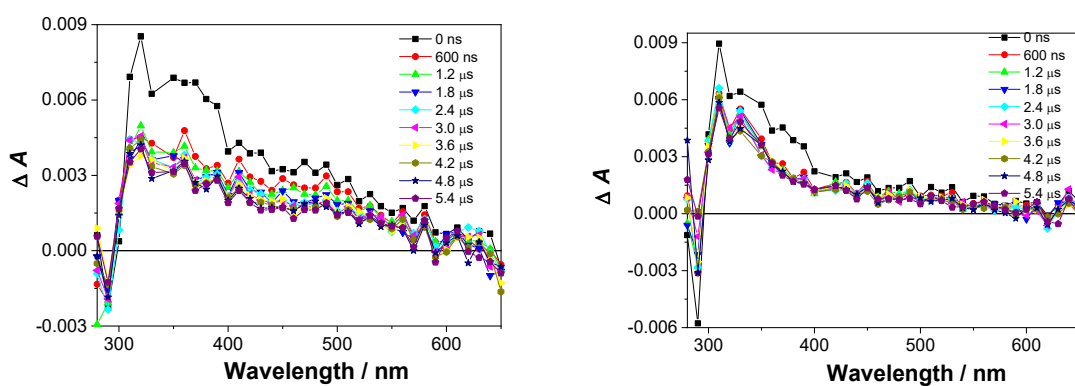

Fig. S22. Transient absorption spectra of Ar-purged (left) and O<sub>2</sub>-purged (right) solution of **3**×HCl ( $c = 9.5 \times 10^{-5}$  M) in CH<sub>3</sub>CN-H<sub>2</sub>O (1:1 v/v, in the presence of phosphate buffer  $c = 50$  mM, pH = 7.0), excited at 266 nm,  $A_{266} = 0.30$ , laser power  $\approx 19$  mJ/pulse.

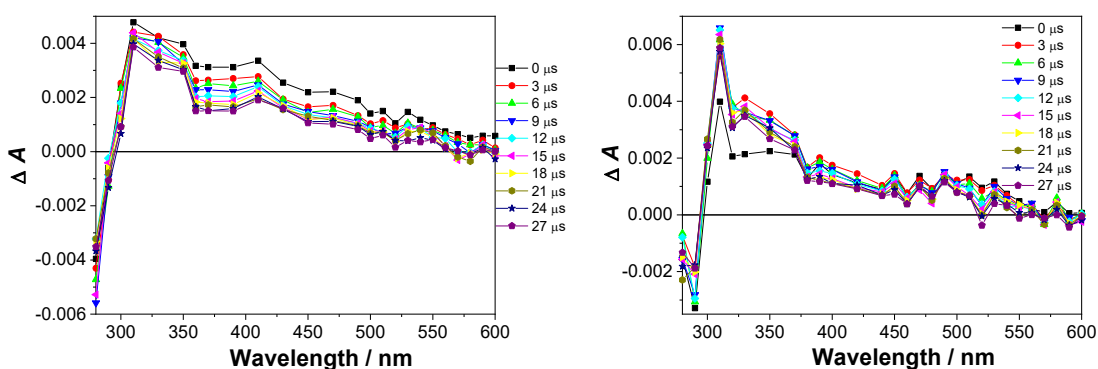

Fig. S23. Transient absorption spectra of Ar-purged (left) and O<sub>2</sub>-purged (right) solution of **3**×HCl ( $c = 9.5 \times 10^{-5}$  M) in CH<sub>3</sub>CN-H<sub>2</sub>O (1:1 v/v, in the presence of phosphate buffer  $c = 50$  mM, pH = 7.0), excited at 266 nm,  $A_{266} = 0.30$ , laser power  $\approx 19$  mJ/pulse.

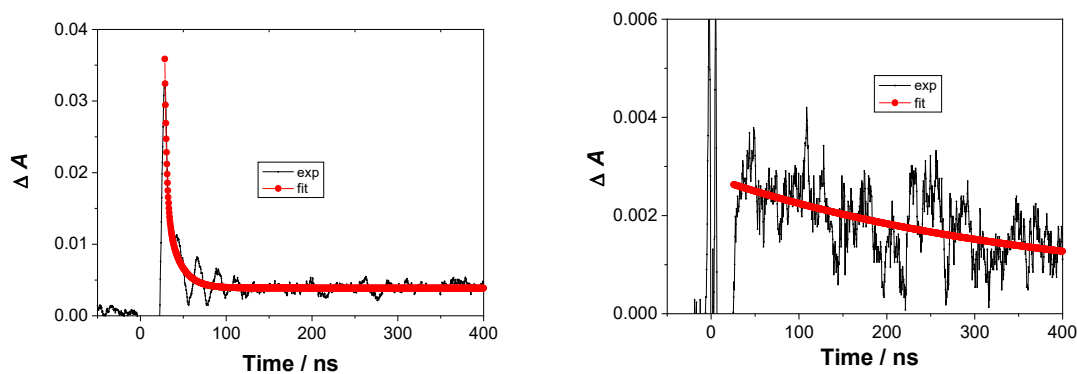

Fig. S24. Decay of transient absorption at 380 nm for Ar-purged (left) and O<sub>2</sub>-purged (right) solution of **3**×HCl ( $c = 9.5 \times 10^{-5}$  M) in CH<sub>3</sub>CN-H<sub>2</sub>O (1:1 v/v, in the presence of phosphate buffer  $c = 50$  mM, pH = 7.0), excited at 266 nm,  $A_{266} = 0.30$ , laser power  $\approx 19$  mJ/pulse.

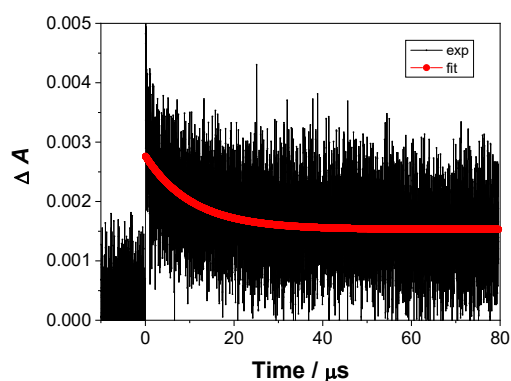

Fig. S25. Decay of transient absorption at 400 nm for Ar-purged solution of ( $c = 9.5 \times 10^{-5}$  M) in CH<sub>3</sub>CN-H<sub>2</sub>O (1:1 v/v, in the presence of phosphate buffer  $c = 50$  mM, pH = 7.0), excited at 266 nm,  $A_{266} = 0.30$ , laser power  $\approx 19$  mJ/pulse.

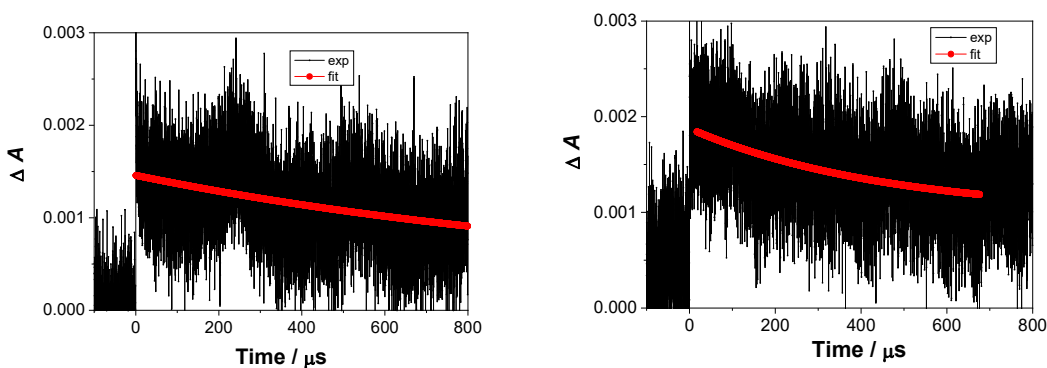

Fig. S26. Decay of transient absorption at 400 nm for Ar-purged (left) and O<sub>2</sub>-purged (right) solution of **3**×HCl ( $c = 9.5 \times 10^{-5}$  M) in CH<sub>3</sub>CN-H<sub>2</sub>O (1:1 v/v, in the presence of phosphate buffer  $c = 50$  mM, pH = 7.0), excited at 266 nm,  $A_{266} = 0.30$ , laser power  $\approx 19$  mJ/pulse.

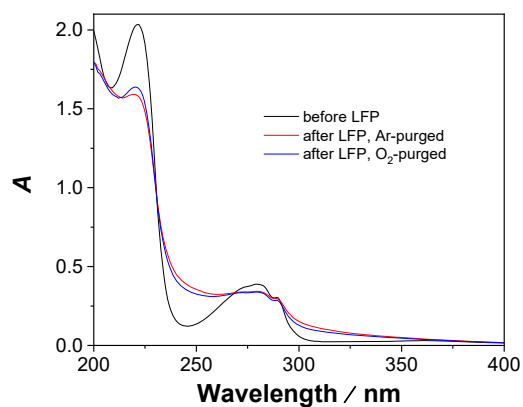

Fig. S27. UV-vis spectra of tripeptide **2** in CH<sub>3</sub>CN ( $c = 2.95 \times 10^{-5}$  M) before and after the LFP experiment.

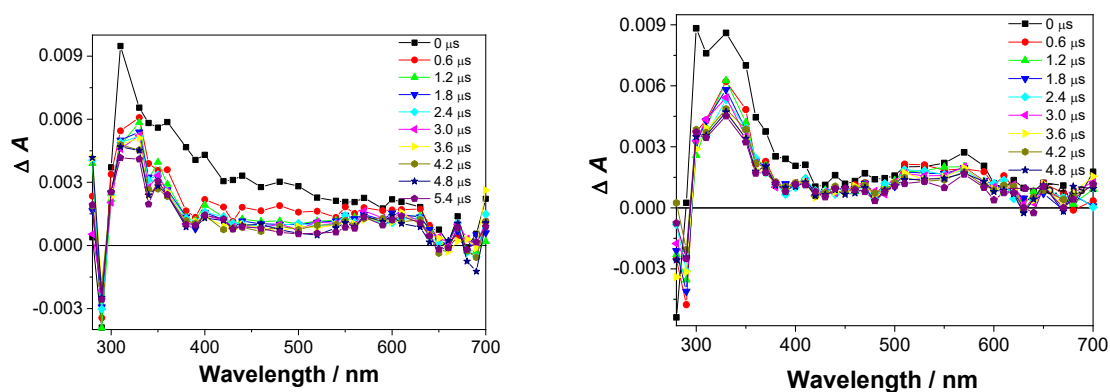

Fig. S28. Transient absorption spectra of Ar-purged (left) and O<sub>2</sub>-purged (right) solution of **2** in CH<sub>3</sub>CN ( $c = 2.95 \times 10^{-5}$  M), excited at 266 nm,  $A_{266} = 0.31$ , laser power  $\approx 19$  mJ/pulse.

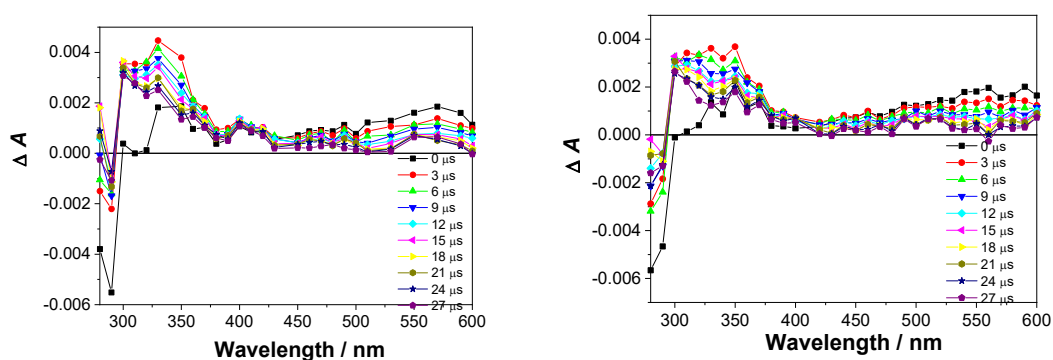

Fig. S29. Transient absorption spectra of Ar-purged (left) and O<sub>2</sub>-purged (right) solution of **2** in CH<sub>3</sub>CN ( $c = 2.95 \times 10^{-5}$  M), excited at 266 nm,  $A_{266} = 0.31$ , laser power  $\approx 19$  mJ/pulse.

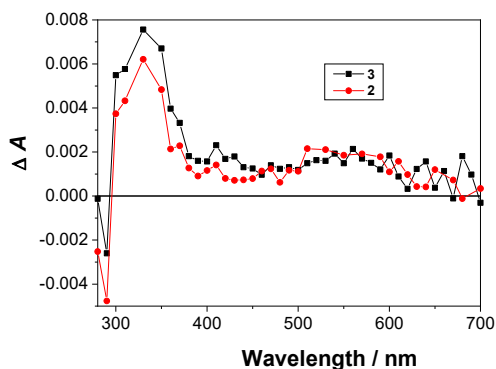

Fig. S30. Transient absorption spectra of optically matched ( $A_{266} = 0.30$ )  $O_2$ -purged solution of **3** in  $CH_3CN$  ( $c = 6.1 \times 10^{-5}$  M) and **2** in  $CH_3CN$  ( $c = 2.95 \times 10^{-5}$  M). The spectra were measured with a delay of 600 ns, laser power  $\approx 19$  mJ/pulse.

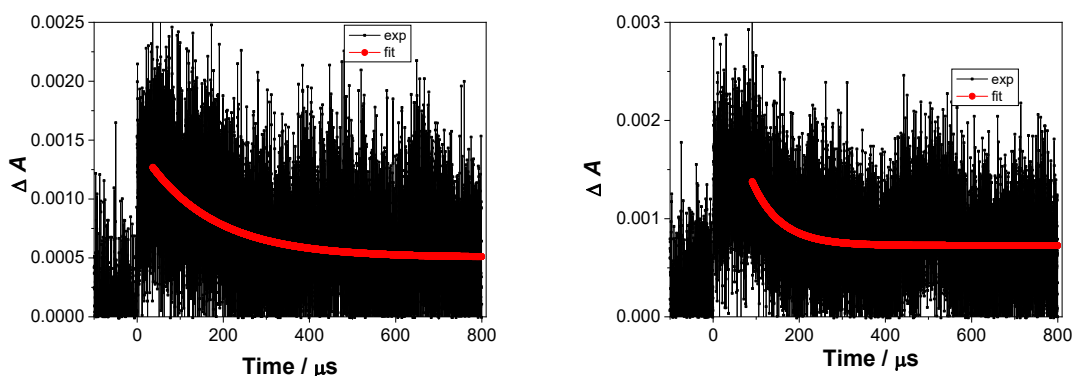

Fig. S31. Decay of transient absorption at 380 nm for Ar-purged (left) and  $O_2$ -purged (right) solution of **2** in  $CH_3CN$  ( $c = 2.95 \times 10^{-5}$  M), excited at 266 nm,  $A_{266} = 0.28$ .

In the Ar-purged  $CH_3CN$  solution of **2** we detected several transients with the lifetimes of  $23 \pm 2$  ns,  $1.1 \pm 0.1$   $\mu$ s,  $13 \pm 1$   $\mu$ s and  $120 \pm 40$   $\mu$ s. In the  $O_2$ -purged solution we detected transients with lifetimes  $19 \pm 1$  ns,  $12 \pm 2$   $\mu$ s and  $55 \pm 10$   $\mu$ s. The transient with the lifetime of 1.1  $\mu$ s may therefore be assigned to the triplet excited state. The other transients were not assigned. A very long-lived transient, which was detected from **3** and tentatively assigned to QM here was not detected. Additional transient was detected at  $\lambda > 500$  nm with  $\tau \approx 9$ -12  $\mu$ s, that was not quenched by  $O_2$ . It was tentatively assigned to Trp radical-cation, since it was not detected in the aqueous solvent (vide infra), and based on the literature precedent.

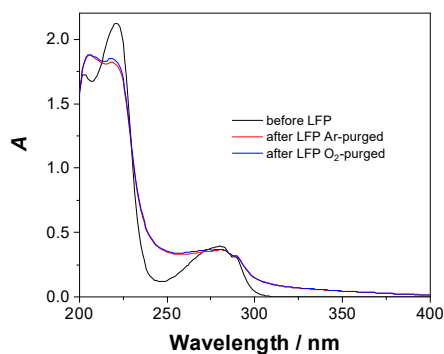

Fig. S32. UV-vis spectra of tripeptide **2** ( $c = 3.2 \times 10^{-5}$  M) in CH<sub>3</sub>CN-H<sub>2</sub>O (1:1 v/v, in the presence of phosphate buffer  $c = 50$  mM, pH = 7.0) before and after the LFP experiment.

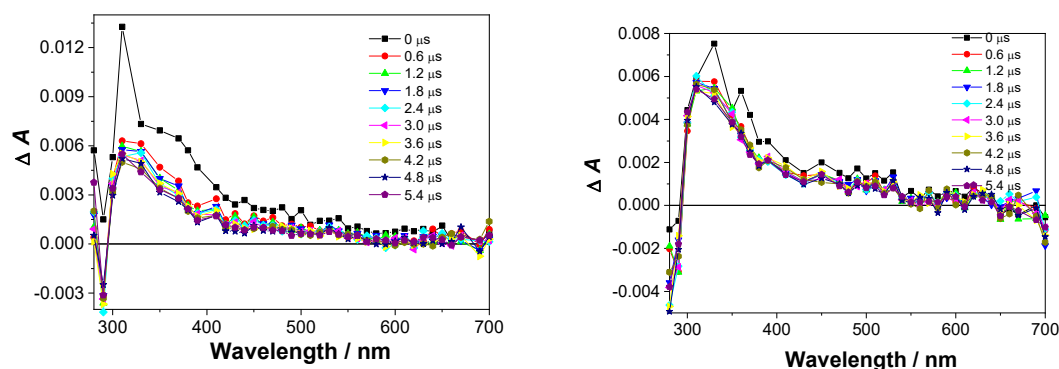

Fig. S33. Transient absorption spectra of Ar-purged (left) and O<sub>2</sub>-purged (right) solution of **2** ( $c = 3.2 \times 10^{-5}$  M) in CH<sub>3</sub>CN-H<sub>2</sub>O (1:1 v/v, in the presence of phosphate buffer  $c = 50$  mM, pH = 7.0), excited at 266 nm,  $A_{266} = 0.30$ , laser power  $\approx 18$  mJ/pulse.

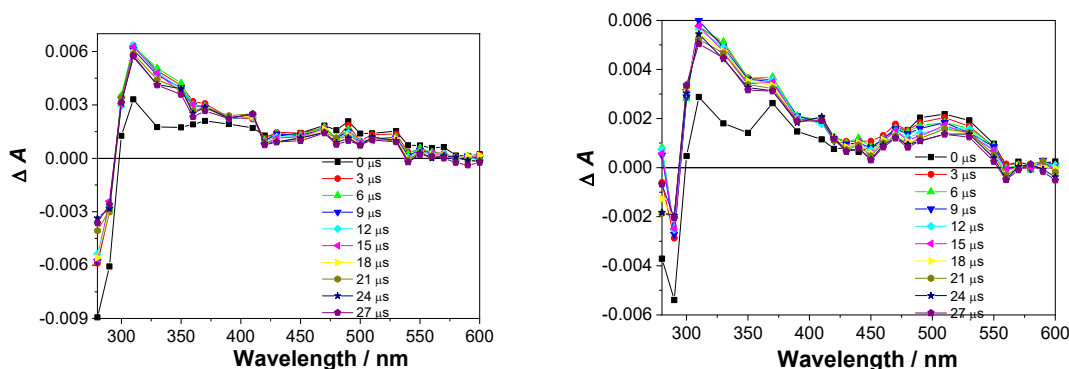

Fig. S34. Transient absorption spectra of Ar-purged (left) and O<sub>2</sub>-purged (right) solution of **2** ( $c = 3.2 \times 10^{-5}$  M) in CH<sub>3</sub>CN-H<sub>2</sub>O (1:1 v/v, in the presence of phosphate buffer  $c = 50$  mM, pH = 7.0), excited at 266 nm,  $A_{266} = 0.30$ , laser power  $\approx 18$  mJ/pulse.

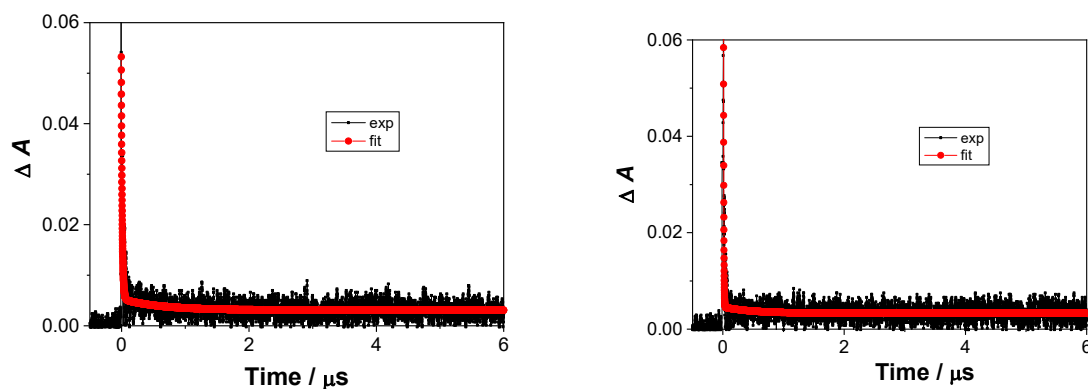

Fig. S35. Decay of transient absorption at 360 nm for Ar-purged (left) and O<sub>2</sub>-purged (right) solution of **2** ( $c = 3.2 \times 10^{-5}$  M) in CH<sub>3</sub>CN-H<sub>2</sub>O (1:1 v/v, in the presence of phosphate buffer  $c = 50$  mM, pH = 7.0),  $A_{266} = 0.30$ , laser power  $\approx 18$  mJ/pulse.

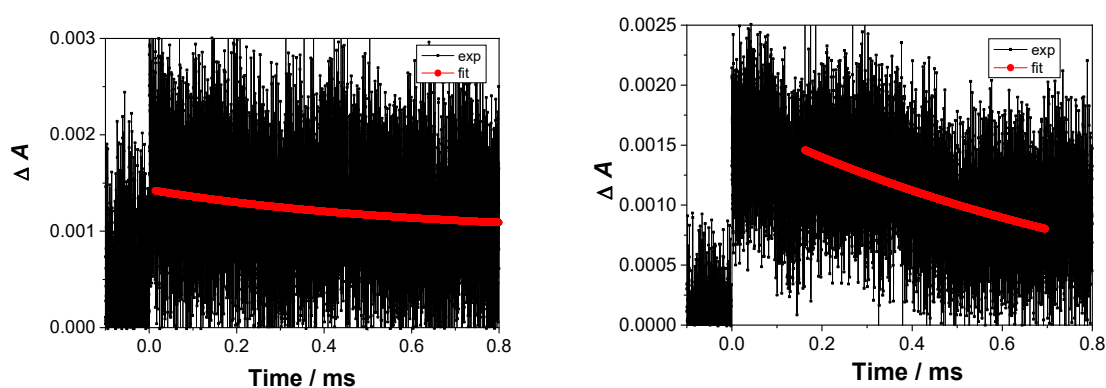

Fig. S36. Decay of transient absorption at 360 nm for Ar-purged (left) and O<sub>2</sub>-purged (right) solution of **2** ( $c = 3.2 \times 10^{-5}$  M) in CH<sub>3</sub>CN-H<sub>2</sub>O (1:1 v/v, in the presence of phosphate buffer  $c = 50$  mM, pH = 7.0),  $A_{266} = 0.30$ , laser power  $\approx 18$  mJ/pulse.

In the Ar-purged CH<sub>3</sub>CN-H<sub>2</sub>O solution of **2** we detected several transients with the lifetimes of  $14 \pm 3$  ns,  $500 \pm 100$  ns,  $13 \pm 1$   $\mu$ s and  $600 \pm 300$   $\mu$ s, and none of the transients was quenched by O<sub>2</sub>. Thus, in the O<sub>2</sub>-purged solution, similar transients were detected with lifetimes  $15 \pm 5$  ns,  $1.1 \pm 0.1$   $\mu$ s and  $900 \pm 500$   $\mu$ s. The transients at  $\lambda > 500$  nm were not detected, in agreement with their assignment to Trp radical cation which in aqueous solution very readily deprotonates to the *N*-centered radical, for which quenching by O<sub>2</sub> is also not anticipated. Thus, the long-lived transient can plausibly be assigned to the Trp radical. Due to concomitant formation of Trp radical and **QM-3** the detection of **3** was more difficult and the spectra of **2** and **3** in aqueous solution are more similar (Fig S35).

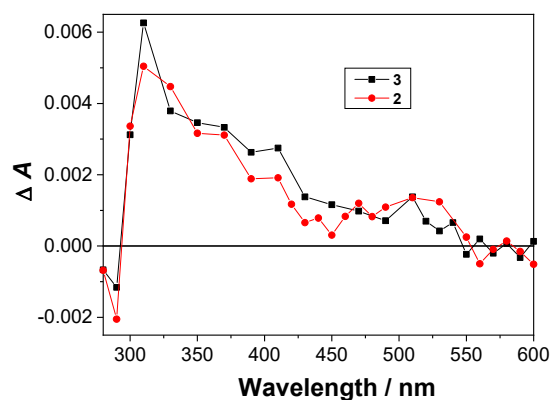

Fig. S37. Transient absorption spectra of optically matched ( $A_{266} = 0.30$ )  $O_2$ -purged solution of **3** ( $c = 6.1 \times 10^{-5}$  M) and **2** ( $c = 3.2 \times 10^{-5}$  M) in  $CH_3CN-H_2O$  (1:1 v/v, in the presence of phosphate buffer  $c = 50$  mM, pH = 7.0). The spectra were measured 600 ns after the laser pulse at 266 nm, laser power  $\approx 19$  mJ/pulse.



#### 4. Noncovalent binding to polynucleotides

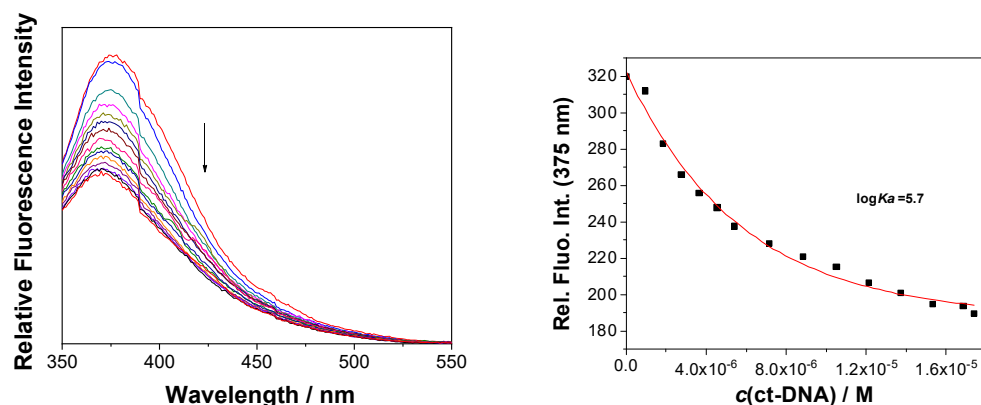

Fig. S38. Left: Fluorescence titration of **1**×HCl ( $c = 3.3 \times 10^{-6}$  M,  $\lambda_{\text{exc}} = 300$  nm) with ct-DNA ( $c = 1.2 \times 10^{-6}$ -  $6.7 \times 10^{-5}$  M); in cacodylate buffer (pH 7.0, 50 mM at 25 °C) with 20% DMSO. Right: Dependence of the fluorescence intensity at 375 nm on the ct-DNA concentration; dots are experimental values and the red line is calculated fit according to the Scatchard model.

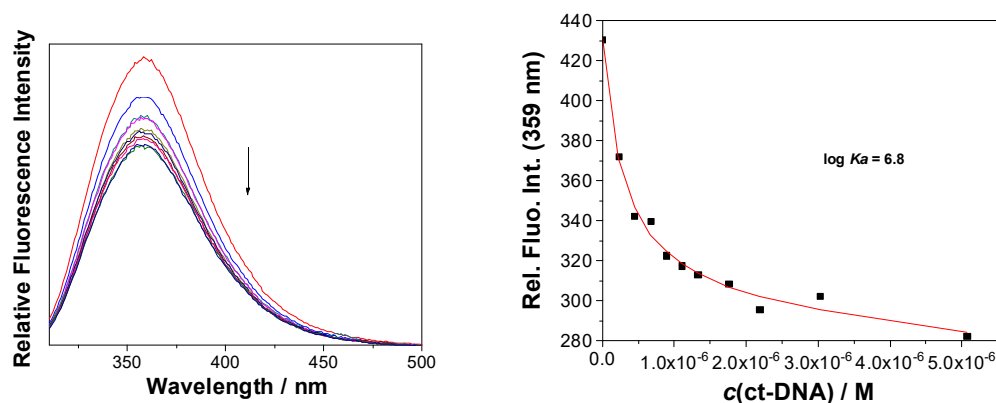

Fig. S39. Left: Fluorescence titration of **2**×HCl ( $c = 2.4 \times 10^{-6}$  M,  $\lambda_{\text{exc}} = 295$  nm) with ct-DNA ( $c = 1.2 \times 10^{-6}$ -  $6.7 \times 10^{-5}$  M); in cacodylate buffer (pH 7.0, 50 mM at 25 °C) with 20% DMSO. Right: Dependence of the fluorescence intensity at 359 nm on the ct-DNA concentration; dots are experimental values and the red line is calculated fit according to the Scatchard model.

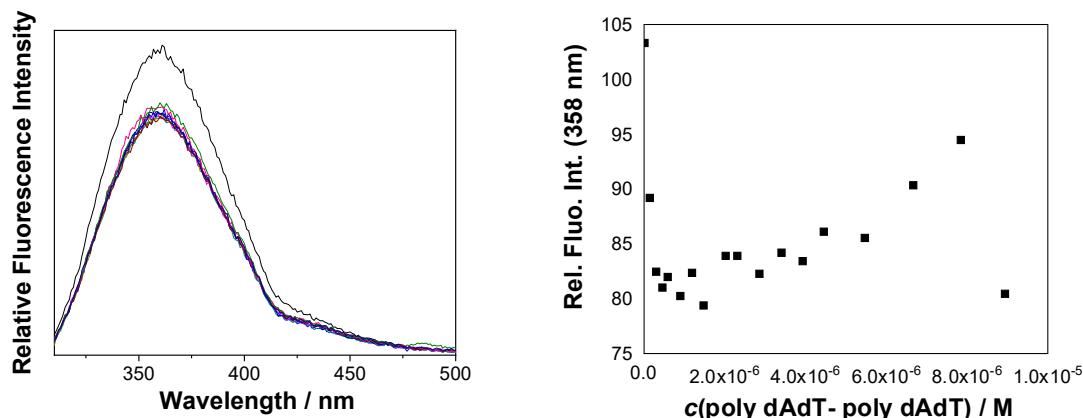

Fig. S40. Fluorescence titration of **2xHCl** ( $c = 3.9 \times 10^{-6}$  M,  $\lambda_{\text{exc}} = 295$  nm) with poly dAdT - poly dAdT in cacodylate buffer (pH 7.0, 50 mM at 25 °C). Small emission changes in opposite directions (quenching at  $r[\text{dye}]/[\text{DNA}] > 1$  and emission increase for  $r < 0.5$ ) did not allow processing of data by Scatchard model.

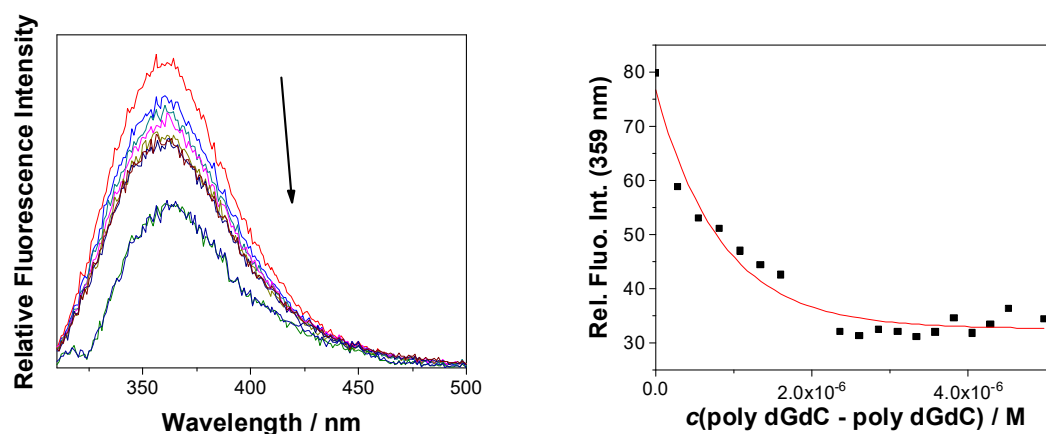

Fig. S41. LEFT: Fluorescence titration of **2xHCl** ( $c = 3.0 \times 10^{-6}$  M,  $\lambda_{\text{exc}} = 295$  nm) with poly dGdC - poly dGdC in cacodylate buffer (pH 7.0, 50 mM at 25 °C); RIGHT: dependence of the fluorescence intensity (normalized to starting emission) at  $\lambda_{\text{em}} = 359$  nm on the  $c(\text{polynucleotide})$ , dots are experimental values and the line represents calculated fit to the Scatchard model, with the fixed value of  $n = [\text{bound } \mathbf{2xHCl}]/[\text{polynucleotide}] = 0.3$ .

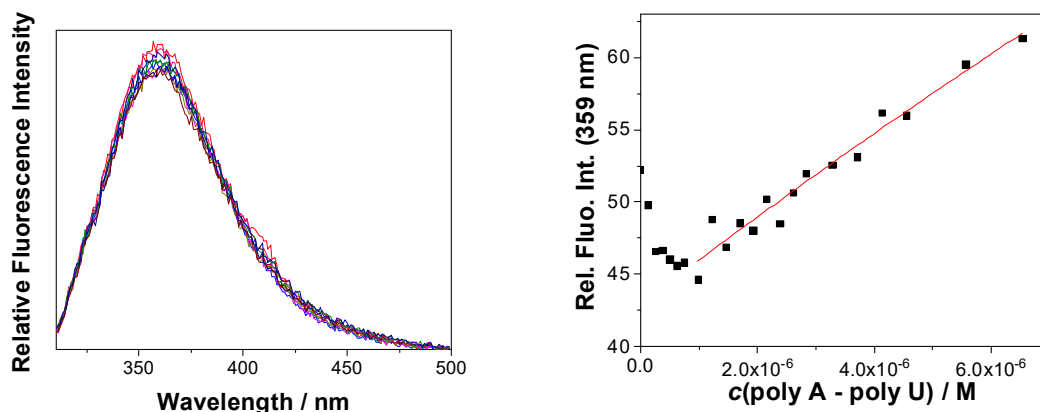

Fig. S42. LEFT: Fluorescence titration of **2xHCl** ( $c = 3.0 \times 10^{-6}$  M,  $\lambda_{\text{exc}} = 295$  nm) with poly A - poly U in cacodylate buffer (pH 7.0, 50 mM at 25 °C); RIGHT: dependence of the fluorescence intensity (normalized to starting emission) at  $\lambda_{\text{em}} = 359$  nm on the  $c(\text{polynucleotide})$ , dots are experimental values and the lines represent calculated fit to the Scatchard model, with the fixed value of  $n = [\text{bound } \mathbf{2xHCl}] / [\text{polynucleotide}] = 0.3$ .

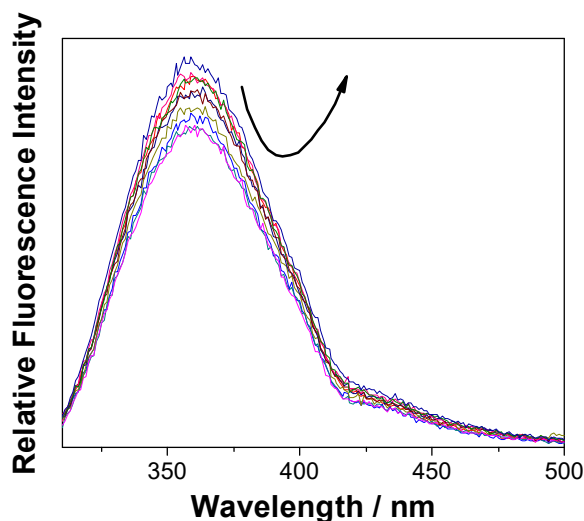

Fig. S43. Fluorescence titration of **3xHCl** ( $c = 3.0 \times 10^{-6}$  M,  $\lambda_{\text{exc}} = 295$  nm) with poly dAdT – poly dAdT in cacodylate buffer (pH 7.0, 50 mM at 25 °C); dependence of the fluorescence intensity at  $\lambda_{\text{em}} = 380$  nm (normalized to starting emission) on the  $c(\text{polynucleotide})$  is shown in Fig. 3.

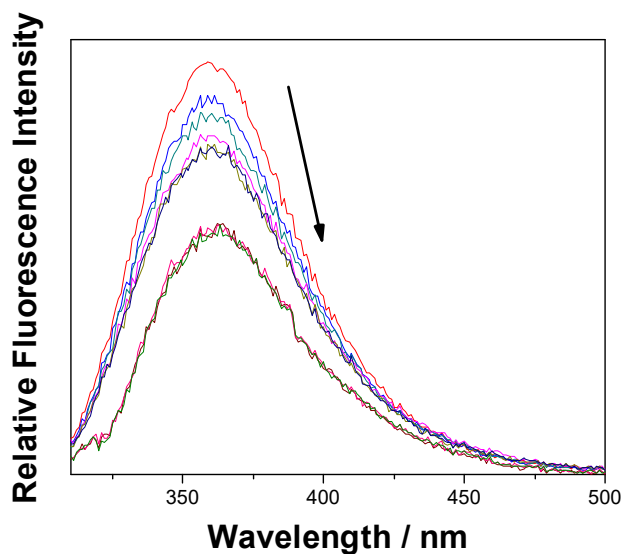

Fig. S44. Fluorescence titration of  $3\times\text{HCl}$  ( $c = 3.0\times 10^{-6}$  M,  $\lambda_{\text{exc}} = 295$  nm) with poly dGdC – poly dGdC in cacodylate buffer (pH 7.0, 50 mM at 25 °C); dependence of the fluorescence intensity at  $\lambda_{\text{em}} = 380$  nm (normalized to starting emission) on the  $c(\text{polynucleotide})$  is shown in Fig. 3.

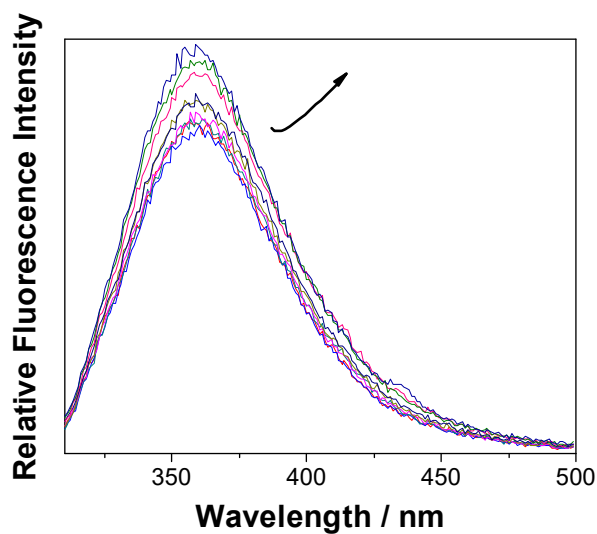

Fig. S45. Fluorescence titration of  $3\times\text{HCl}$  ( $c = 3.0\times 10^{-6}\text{mol dm}^{-3}$ ,  $\lambda_{\text{exc}} = 295$  nm) with poly A – poly U in cacodylate buffer (pH 7.0, 50 mM at 25 °C); dependence of the fluorescence intensity at  $\lambda_{\text{em}} = 380$  nm (normalized to starting emission) on the  $c(\text{polynucleotide})$  shown in Fig. 3. Done in cacodylate buffer (pH 7.0,  $I=50$  mM, at 25 °C).

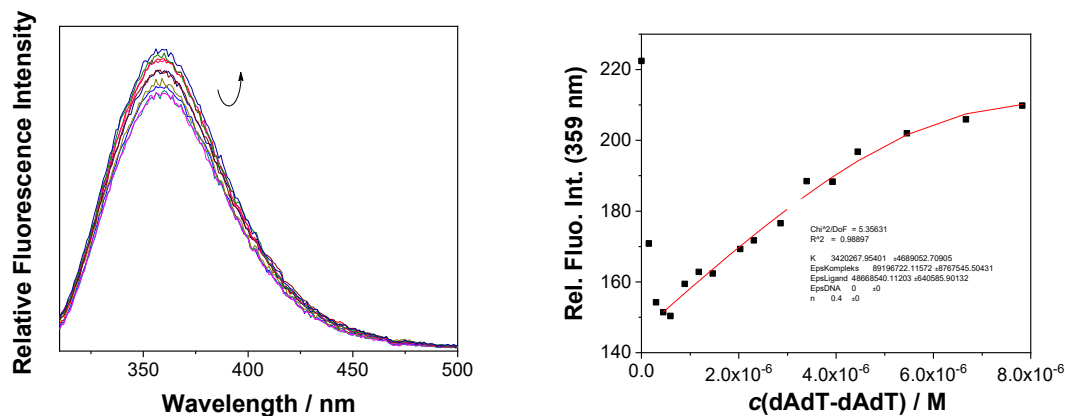

Fig. S46. Left: Fluorimetric titration of  $3\times\text{HCl}$  ( $c = 3.0\times 10^{-6}$  M,  $\lambda_{\text{exc}} = 280$  nm) with poly dAdT - poly dAdT ( $c = 1.2\times 10^{-6}$  -  $6.7\times 10^{-5}$  M); in cacodylate buffer (pH 7.0, 50 mM, at 25 °C). Right: Dependence of the fluorescence intensity at 359 nm on the polynucleotide concentration; dots are experimental values and the red line is calculated fit according to the Scatchard model, with the fixed value of  $n = [3\times\text{HCl}]/[\text{dAdT}] = 0.4$ .

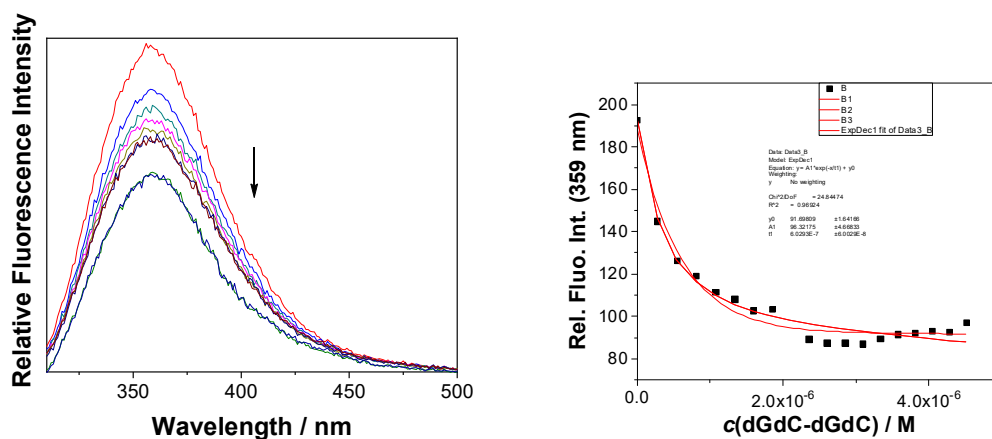

Fig. S47. Left: Fluorimetric titration of  $3\times\text{HCl}$  ( $c = 3.0\times 10^{-6}$  M,  $\lambda_{\text{exc}} = 280$  nm) with poly dGdC - poly dGdC ( $c = 1.2\times 10^{-6}$  -  $6.7\times 10^{-5}$  M); in cacodylate buffer (pH 7.0, 50 mM, at 25 °C). Right: Dependence of the fluorescence intensity at 359 nm on the polynucleotide concentration; dots are experimental values and the red line is calculated fit according to the Scatchard model. Data could not be fit to the model with the fixed value of  $n = [3\times\text{HCl}]/[\text{dAdT}] < 1$ .

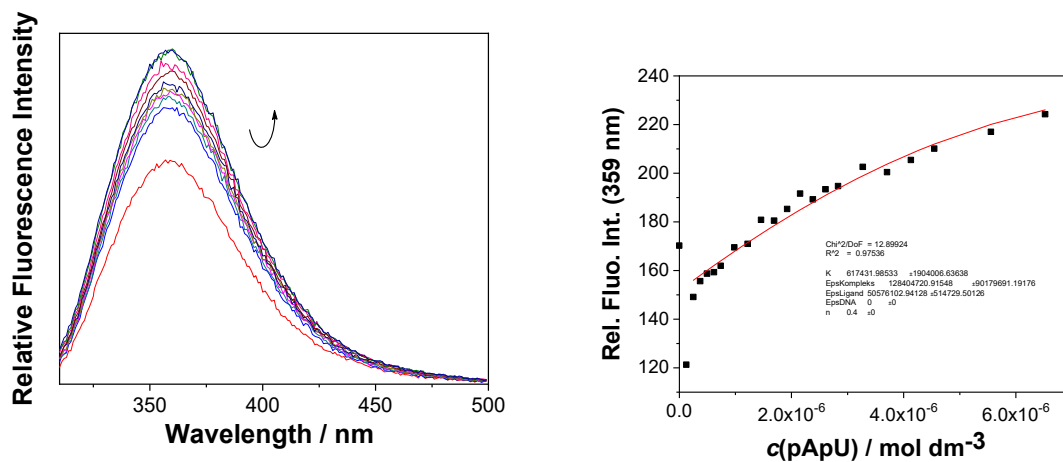

Fig. S48. Left: Fluorimetric titration of  $\mathbf{3} \times \text{HCl}$  ( $c = 3.0 \times 10^{-6} \text{ M}$ ,  $\lambda_{\text{exc}} = 280 \text{ nm}$ ) with polyA-poly U ( $c = 1.2 \times 10^{-6} - 6.7 \times 10^{-5} \text{ M}$ ); in cacodylate buffer (pH 7.0, 50 mM, at  $25^\circ \text{C}$ ). Right: Dependence of the fluorescence intensity at 359 nm on the poly A – poly U concentration; dots are experimental values and the red line is calculated fit according to the Scatchard model with the fixed value of  $n = [\mathbf{3} \times \text{HCl}]/[\text{poly A – poly U}] = 0.4$ .

The effect to the polynucleotide melting temperature is defined as:

$$\Delta T_m = T_m (\text{complex}) - T_m (\text{ct-DNA}) \quad (\text{S8})$$

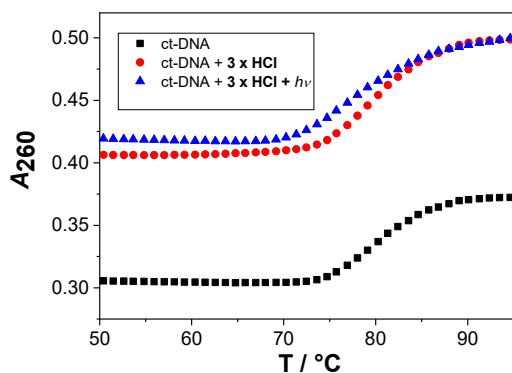

Fig. S49. Thermal denaturation of ct-DNA ( $c = 3 \times 10^{-5}$  M), in the presence of **3**×**HCl** at ratio  $r[\mathbf{3} \times \mathbf{HCl}] / [\text{polynucleotide}] = 0.3$ , at pH = 7.0, cacodylate buffer (50 mM), and after irradiation of ct-DNA and **3** (300 nm, 5 min).

Table S3. The  $\Delta T_m$  values<sup>a</sup> of ct-DNA upon the addition of **3**×**HCl** at pH 7.0 (sodium cacodylate buffer,  $I = 0.05$  M) and upon irradiation (300 nm, 8 lamps, 5 min).

| Compound/condition             | $\Delta T_m / ^\circ\text{C}$ |
|--------------------------------|-------------------------------|
| <b>3</b> × <b>HCl</b> (dark)   | 0.5                           |
| <b>3</b> × <b>HCl</b> + $h\nu$ | -2.2                          |

<sup>a</sup> Error in  $\Delta T_m : \pm 0.5^\circ\text{C}$ ; The melting temperature was determined from the inflection point of the dependence of absorbance on temperature.<sup>[6]</sup>  $r[\mathbf{3} \times \mathbf{HCl}] / [\text{ct-DNA}] = 0.3$ .

## CD experiments

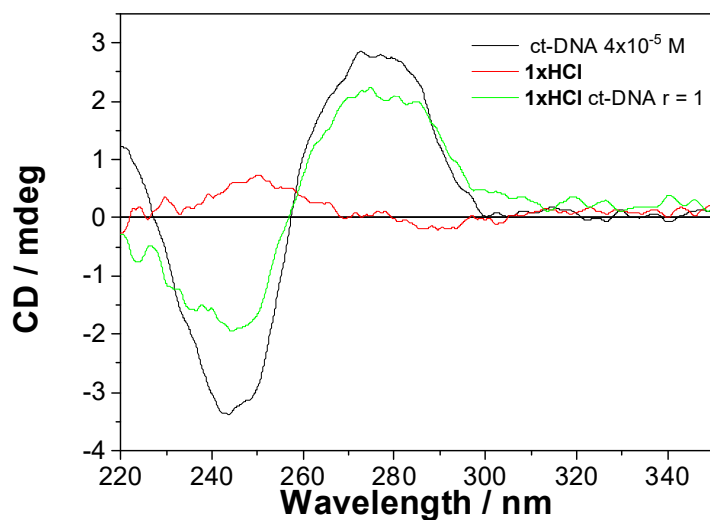

Fig. S50. CD spectra of ct-DNA ( $c = 4.0 \times 10^{-5}$  M), **1xHCl** and their mixture at  $r[\mathbf{1xHCl}]/[\text{ct-DNA}] = 1$ . The measurement was performed in cacodylate buffer / 20% DMSO (pH 7.0, 50 mM, at 25 °C).

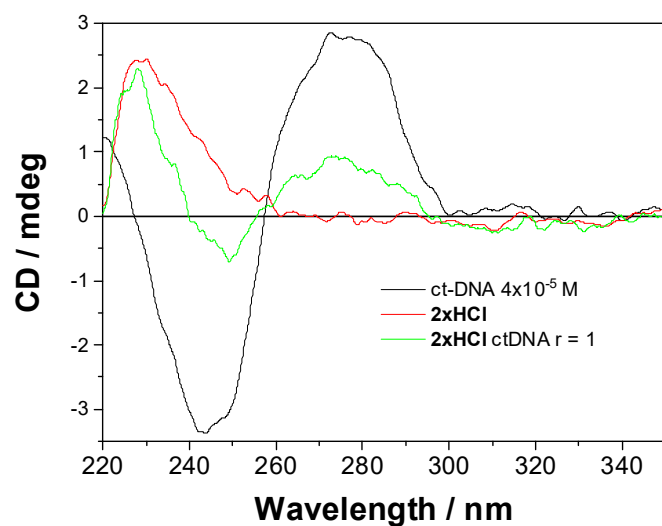

Fig. S51. CD spectra of ct-DNA ( $c = 4.0 \times 10^{-5}$  M), **2xHCl** and their mixture at  $r[\mathbf{2xHCl}]/[\text{ct-DNA}] = 1$ . The measurement was performed in cacodylate buffer / 20% DMSO (pH 7.0, 50 mM, at 25 °C).



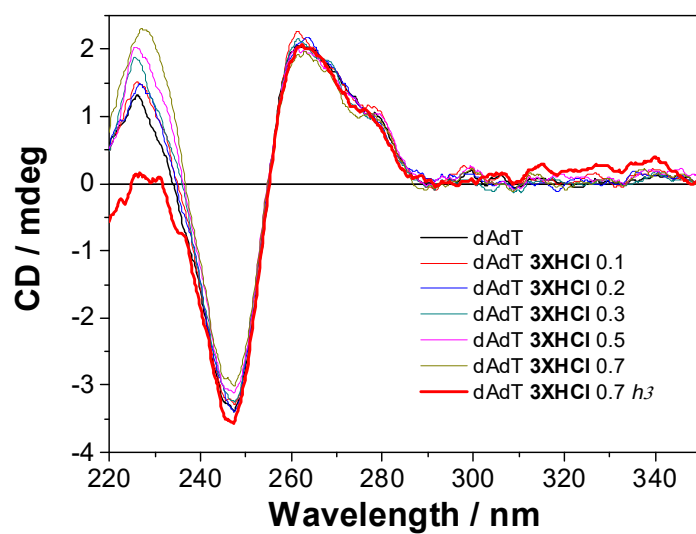

Fig. S52. CD spectra of poly dAdT – poly dAdT ( $c = 2.0 \times 10^{-5}$  M) in the presence of different ratios  $r[3 \times \text{HCl}]/[\text{AT-DNA}]$ . The measurement was performed in cacodylate buffer / 20% DMSO (pH 7.0, 50 mM, at 25 °C).

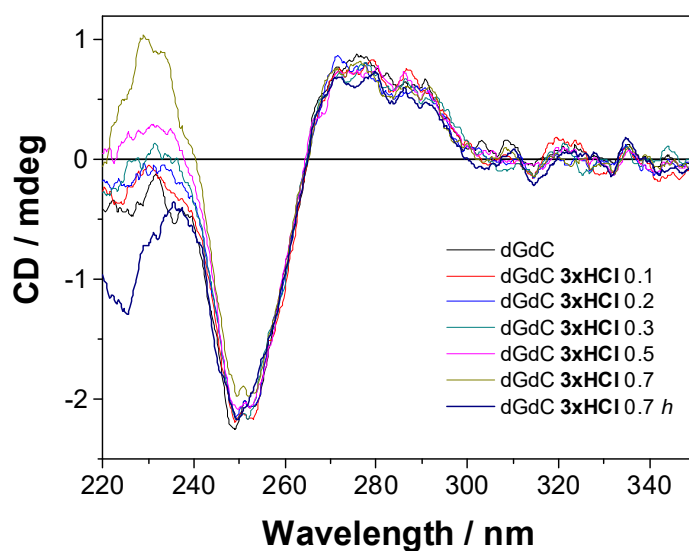

Fig. S53. CD spectra of poly dGdC – poly dGdC ( $c = 2.0 \times 10^{-5}$  M) in the presence of different ratios  $r[3 \times \text{HCl}]/[\text{GC-DNA}]$ . The measurement was performed in cacodylate buffer (pH 7.0, 50 mM, at 25 °C).

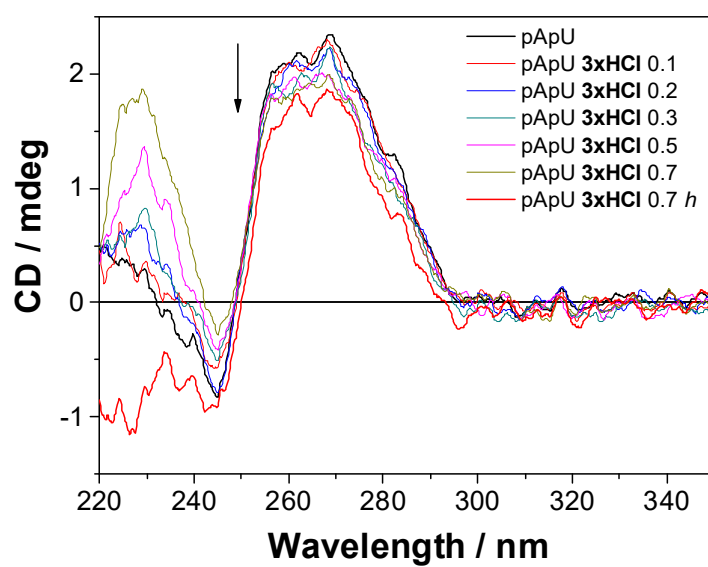

Fig. S54. CD spectra of poly A – poly U ( $c = 2.0 \times 10^{-5}$  M) in the presence of different ratios  $r[3 \times \text{HCl}]/[\text{AU-RNA}]$ . The measurement was performed in cacodylate buffer (pH 7.0, 50 mM, at 25 °C).

## 5. Covalent binding to oligonucleotides

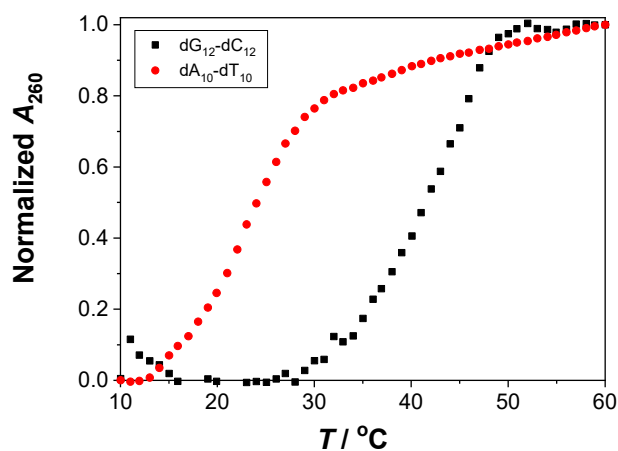

Fig. S55. Thermal denaturation of  $\text{dG}_{12}\text{-dC}_{12}$  and  $\text{dA}_{10}\text{-dT}_{10}$  ( $c = 2.0 \times 10^{-5} \text{ M}$ ) in ammonium acetate buffer (pH = 7.0, 100 mM). The measured  $T_m$  for  $\text{dG}_{12}\text{-dC}_{12}$  is 40 °C, and for  $\text{dA}_{10}\text{-dT}_{10}$  is 22 °C.

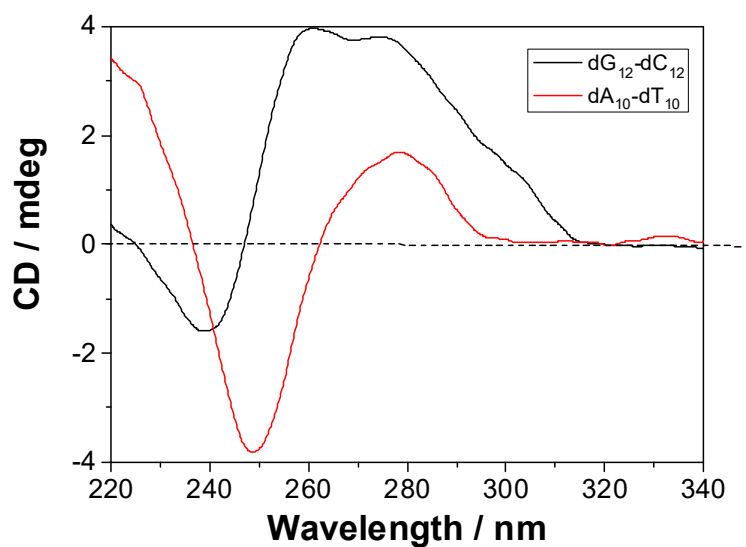

Fig. S56. CD spectra of  $\text{dG}_{12}\text{-dC}_{12}$  and  $\text{dA}_{10}\text{-dT}_{10}$  ( $c = 2.0 \times 10^{-5} \text{ M}$ ) in ammonium acetate buffer (pH = 7.0, 100 mM) at 25 °C.

Analyses of the solutions containing annealed oligonucleotides and **3×HCl** were performed on a Shimadzu HPLC equipped with a dyode array detector and a PLRP-S 5 µm column. The parameters for the chromatography method are given in Table S4.

Table S4. Chromatography method for the analysis of oligonucleotides and **3×HCl**.

| <i>t</i> / min | B (%) |
|----------------|-------|
| 0              | 5     |
| 5              | 5     |
| 15             | 40    |
| 20             | 100   |
| 25             | 100   |
| 32             | 5     |
| 40             | 5     |

A: NH<sub>4</sub>Ac (100 mM, pH 7.0)

B: ACN

Flow rate: 0.5 mL/ min.

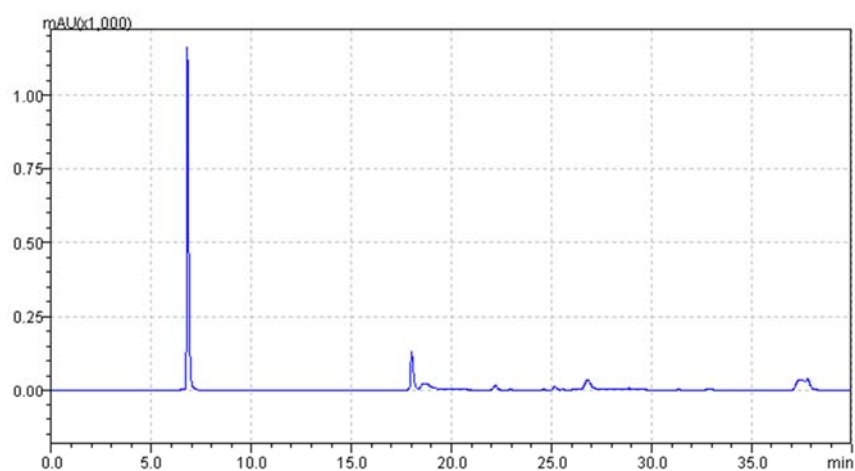

Fig. S57. HPLC chromatogram of dG<sub>12</sub>-dC<sub>12</sub>.

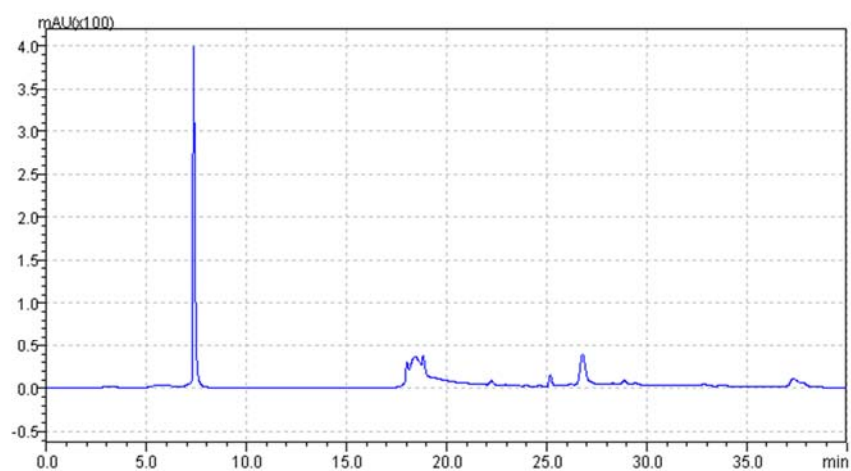

Fig. S58. HPLC chromatogram of dG<sub>12</sub>-dC<sub>12</sub> after 15 min irradiation at 300 nm (8 lamps).

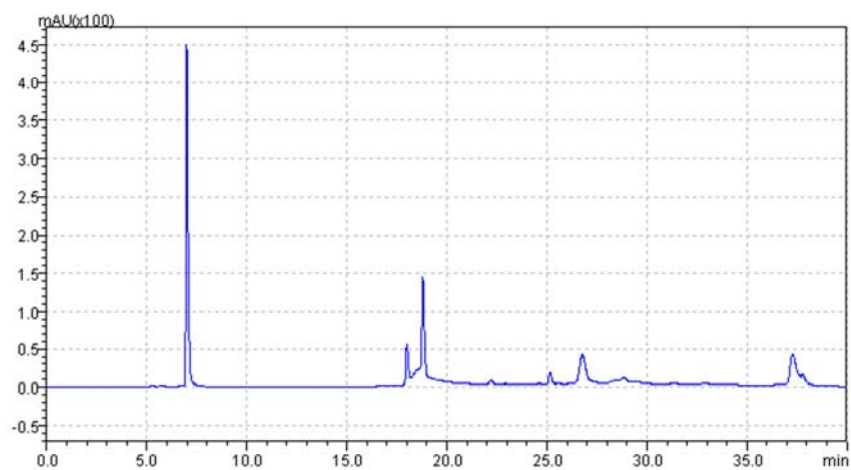

Fig. S59. HPLC chromatogram of dG<sub>12</sub>-dC<sub>12</sub> and **3**×HCl before the irradiation.

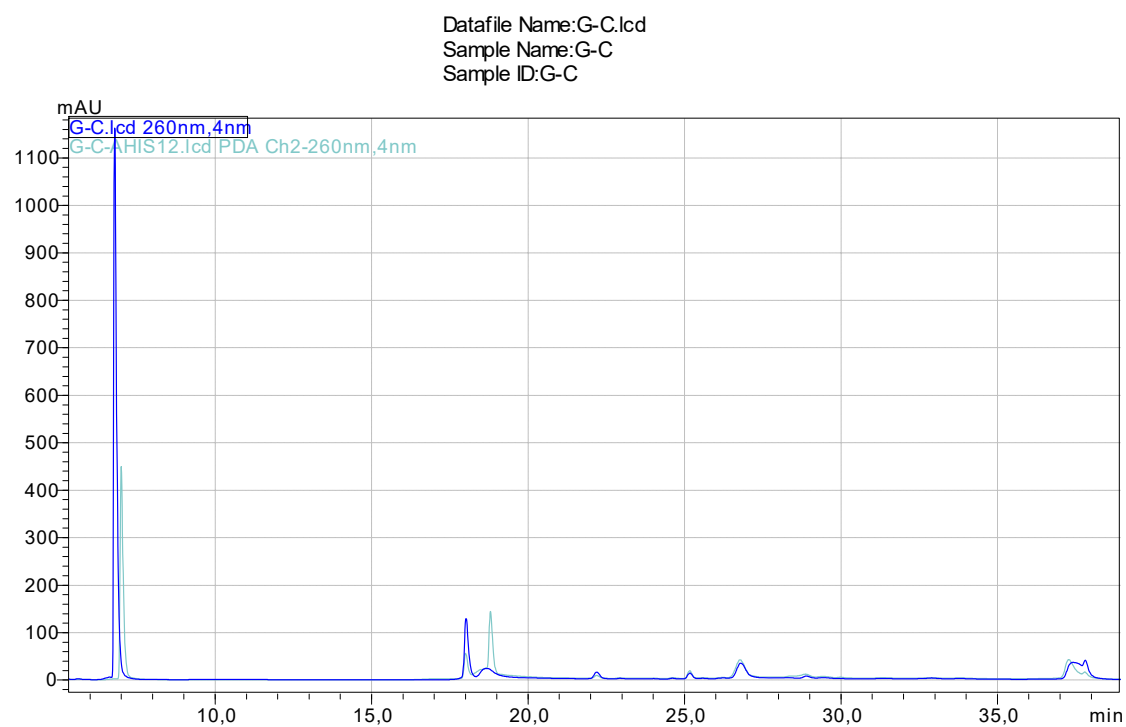

Fig. S60. Overlapped HPLC chromatogram of dG<sub>12</sub>-dC<sub>12</sub> and **3**×HCl before the irradiation.

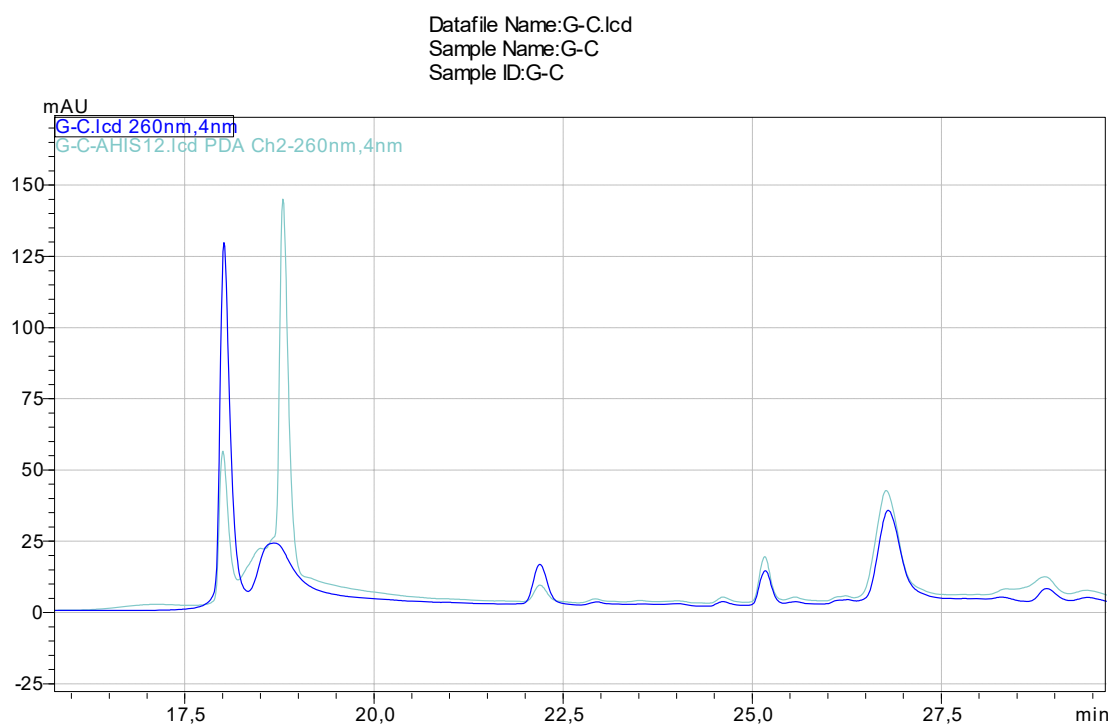

Fig. S61. Overlapped parts of HPLC chromatogram of dG<sub>12</sub>-dC<sub>12</sub> and **3**×HCl before the irradiation.

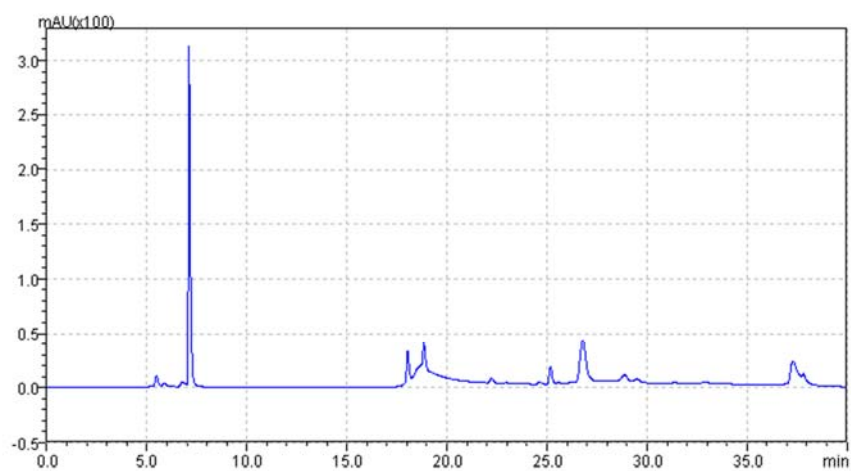

Fig. S62. HPLC chromatogram of dG<sub>12</sub>-dC<sub>12</sub> and 3×HCl after 1 h irradiation at 300 nm (8 lamps).

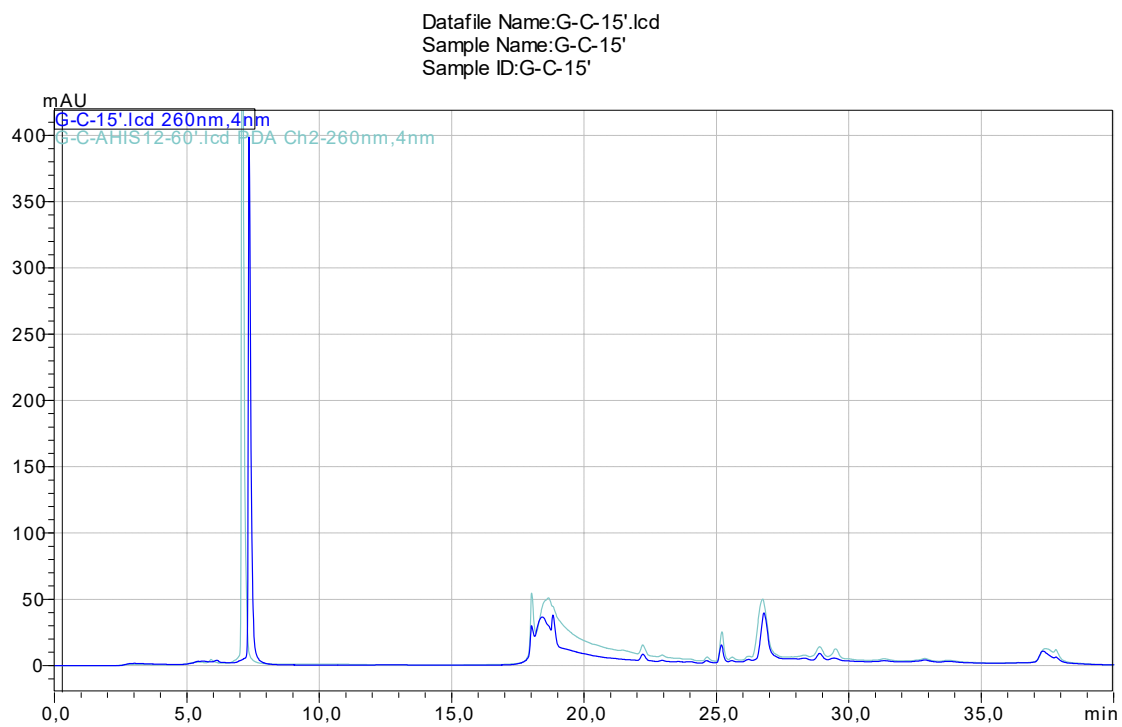

Fig. S63. Overlapped HPLC chromatogram of dG<sub>12</sub>-dC<sub>12</sub> and 3×HCl after 1 h irradiation at 300 nm (8 lamps).

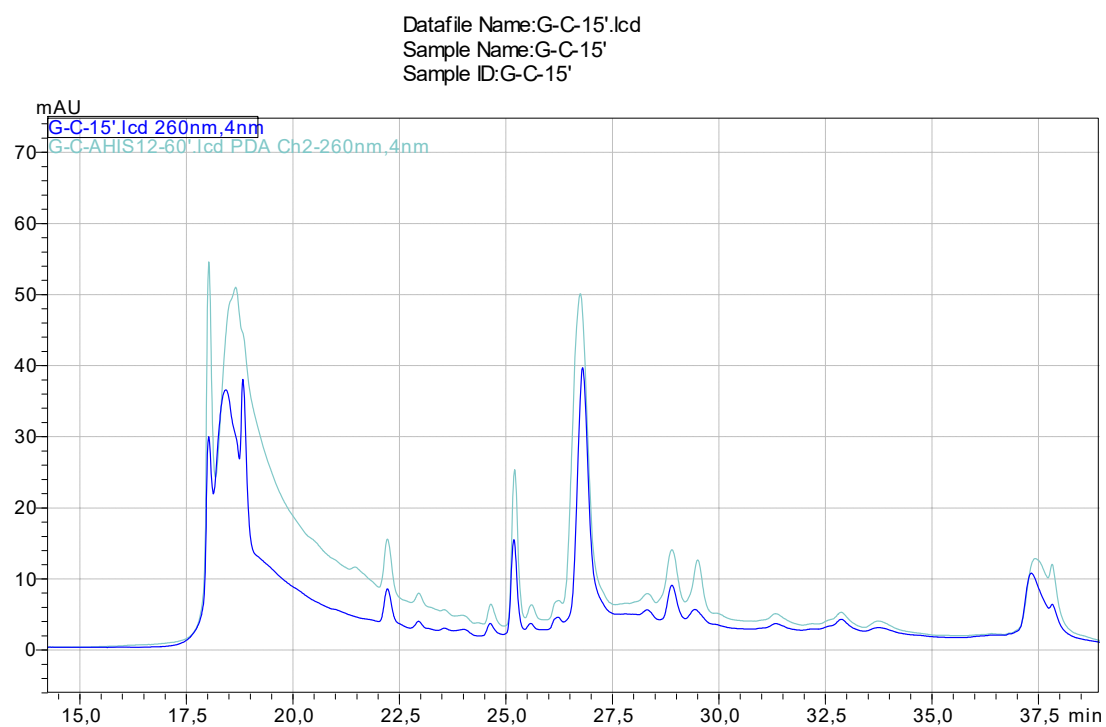

Fig. S64. Overlapped parts of HPLC chromatogram of dG<sub>12</sub>-dC<sub>12</sub> and **3**×HCl after 1 h irradiation at 300 nm (8 lamps).

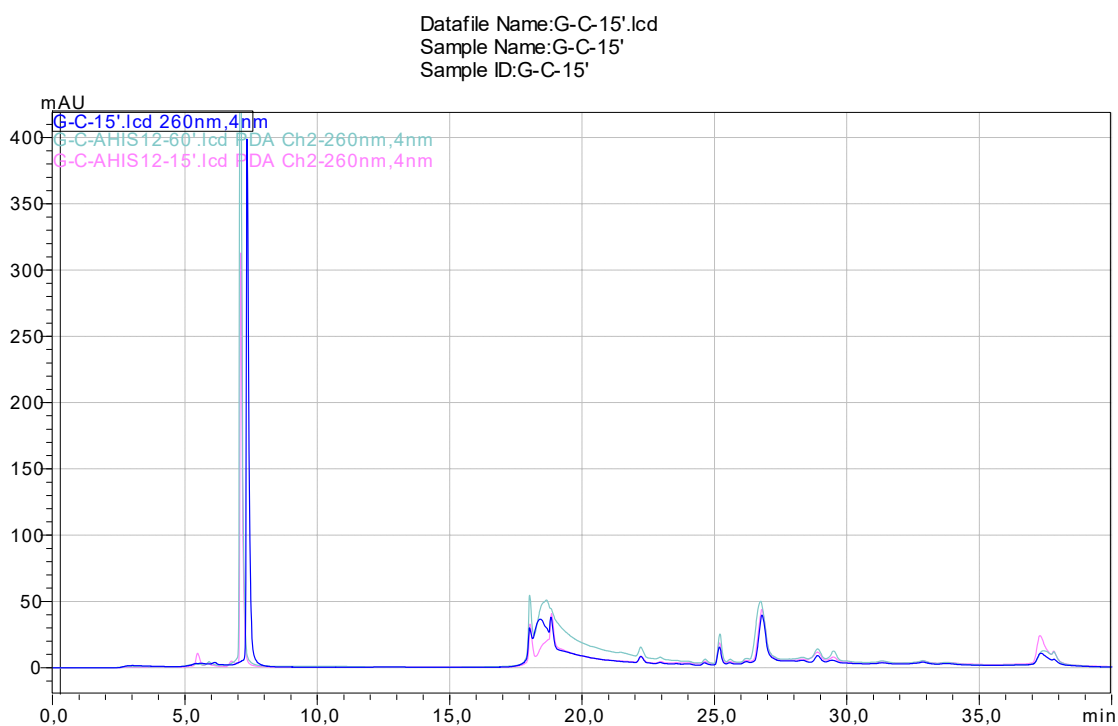

Fig. S65. Overlapped HPLC chromatogram of dG<sub>12</sub>-dC<sub>12</sub> and **3**×HCl after 1 h irradiation at 300 nm (8 lamps).



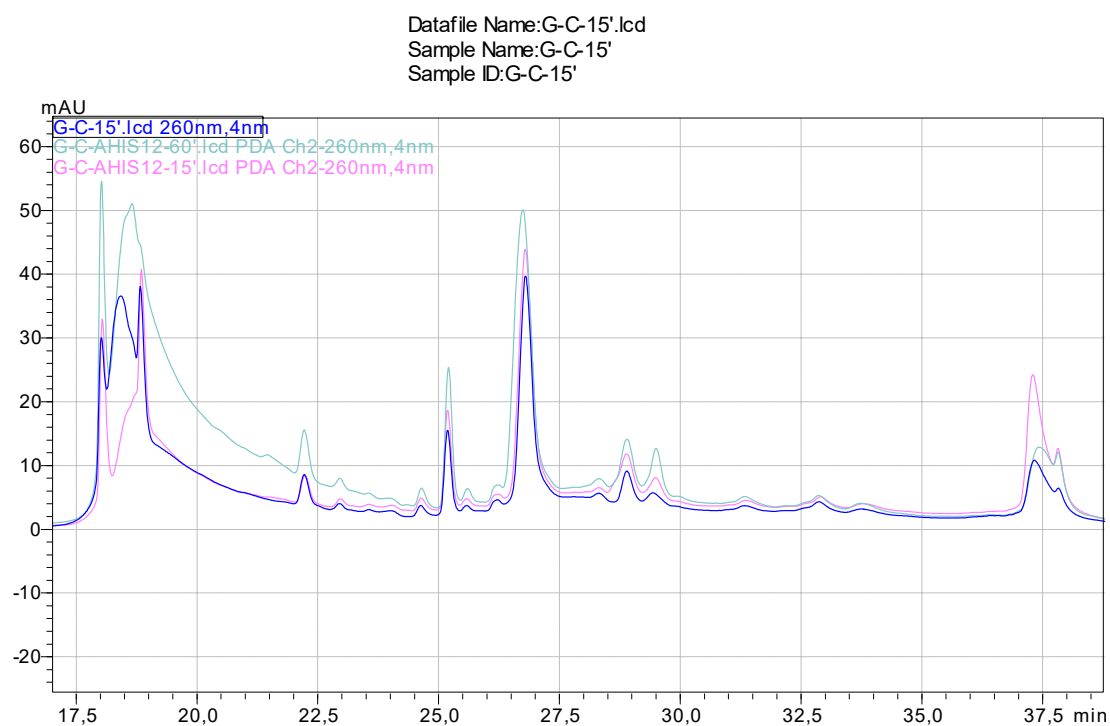

Fig. S66. Overlapped parts of HPLC chromatogram of dG<sub>12</sub>-dC<sub>12</sub> and **3**×HCl after 1 h irradiation at 300 nm (8 lamps).

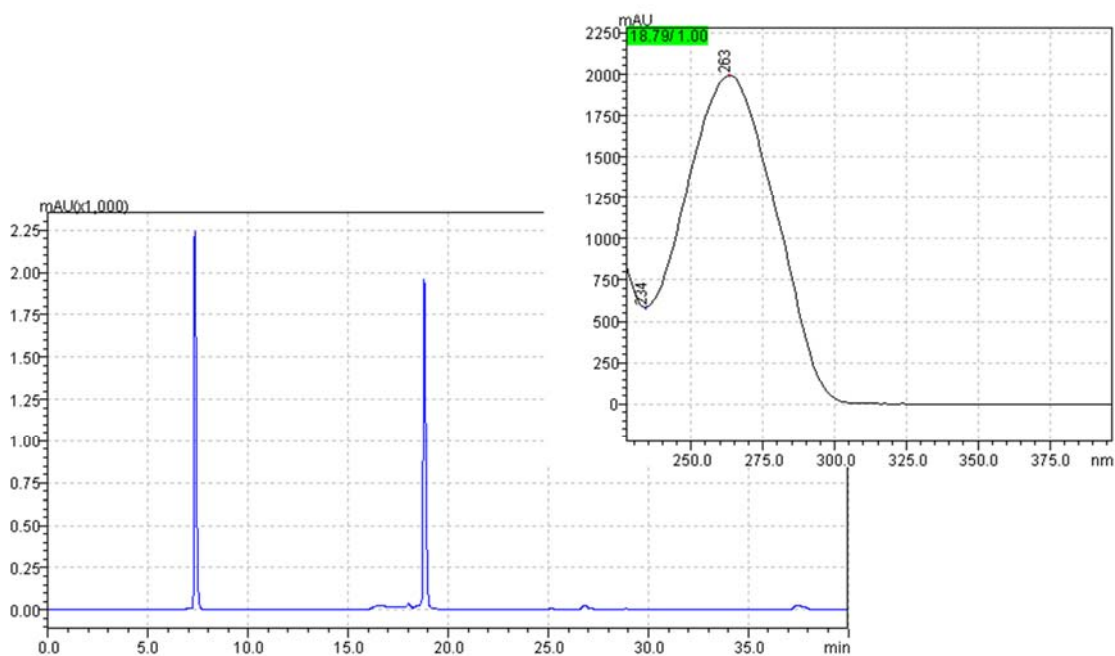

Fig. S67. HPLC chromatogram of dA<sub>10</sub>-dT<sub>10</sub> (inset: absorption spectrum of the species with rt 18.8 min).

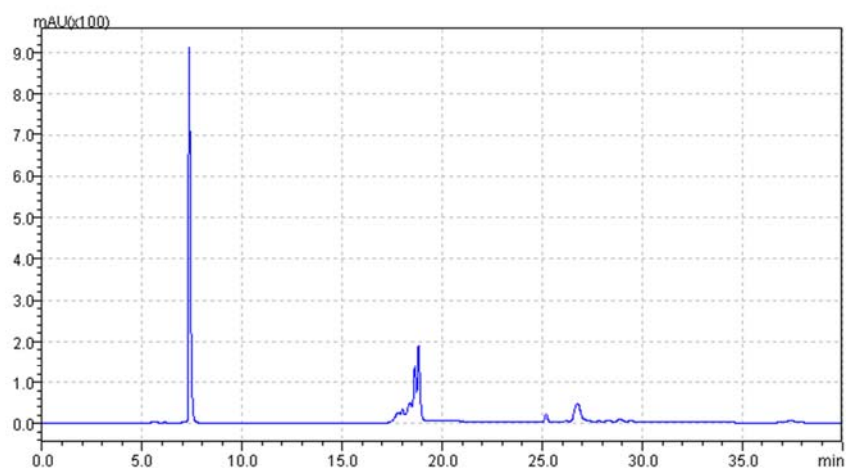

Fig. S68. HPLC chromatogram of dA<sub>10</sub>-dT<sub>10</sub> after 15 min irradiation at 300 nm (8 lamps).

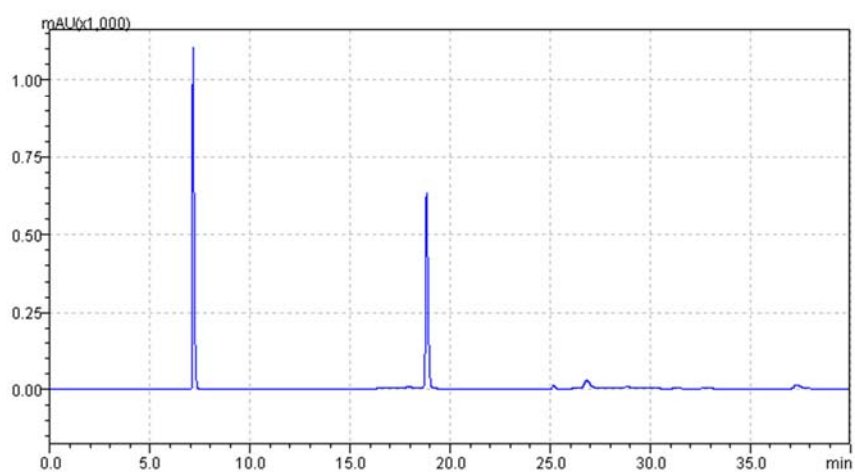

Fig. S69. HPLC chromatogram of dA<sub>10</sub>-dT<sub>10</sub> and 3×HCl before the irradiation.

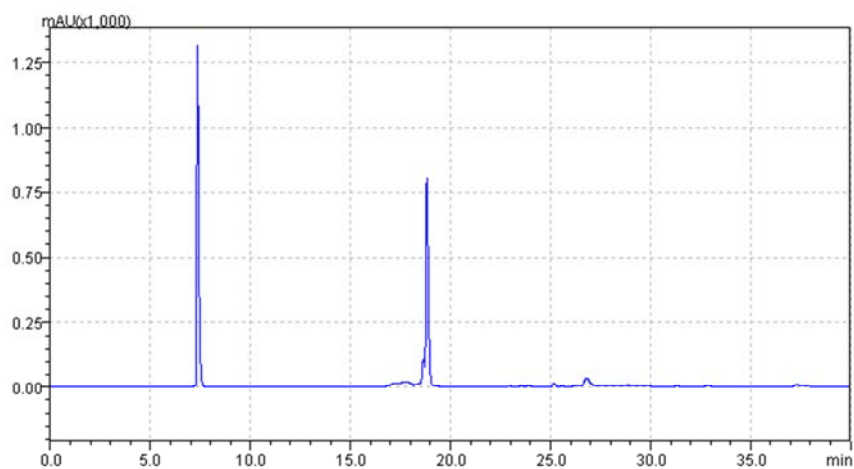

Fig. S70. HPLC chromatogram of dA<sub>10</sub>-dT<sub>10</sub> and **3**×HCl after 1 h irradiation at 300 nm (8 lamps).

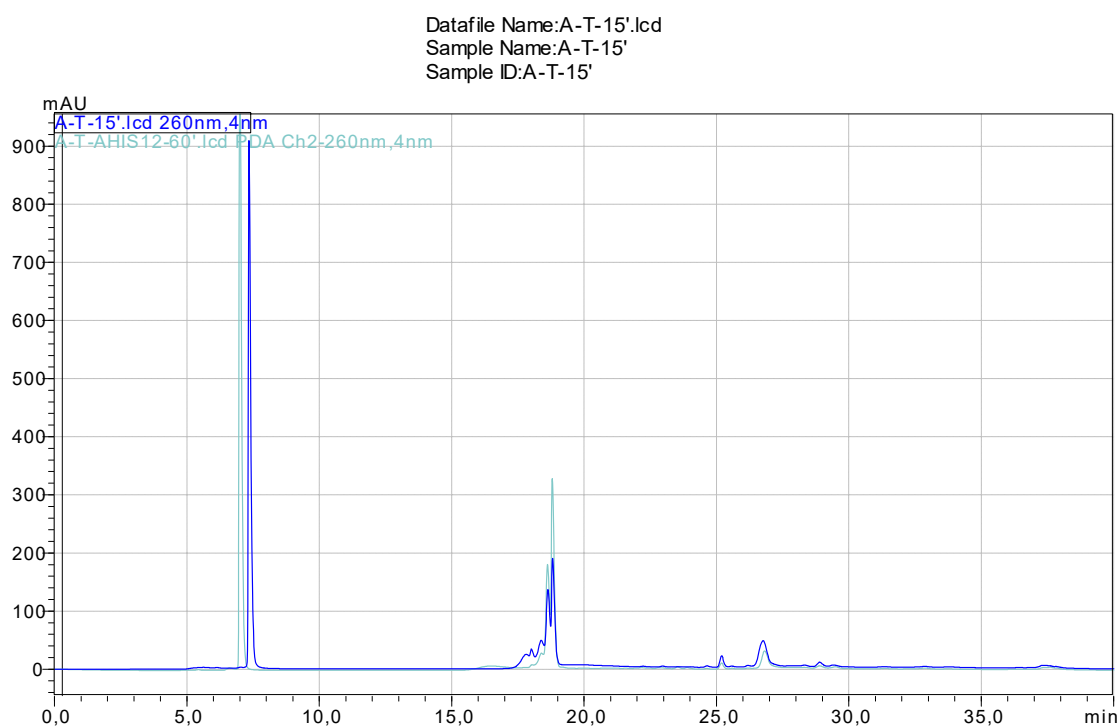

Fig. S71. Overlapped HPLC chromatogram of dA<sub>10</sub>-dT<sub>10</sub> and **3**×HCl after 1 h irradiation at 300 nm (8 lamps).

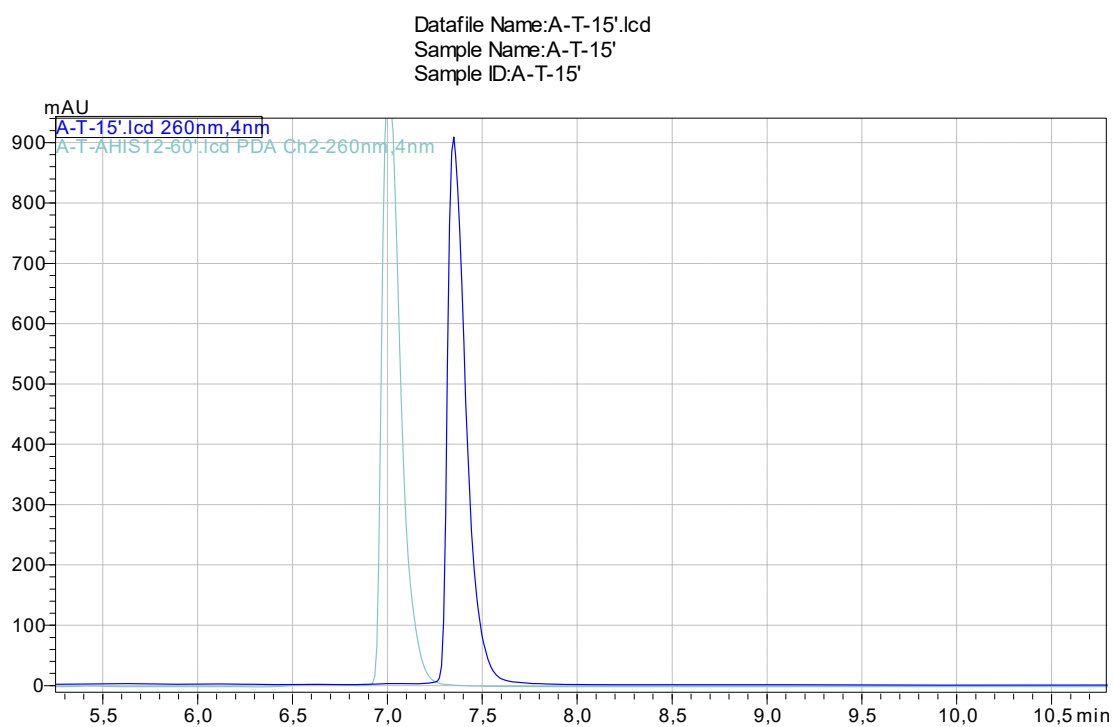

Fig. S72. Overlapped parts of HPLC chromatogram of dA<sub>10</sub>-dT<sub>10</sub> and 3×HCl after 1 h irradiation at 300 nm (8 lamps).

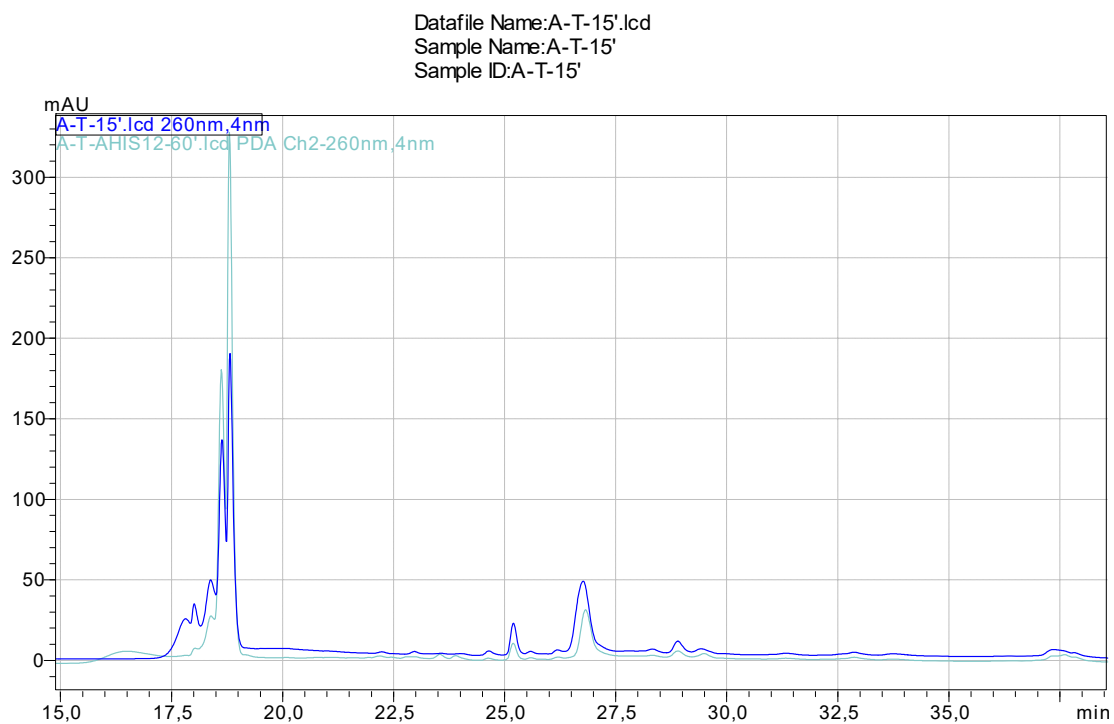

Fig. S73. Overlapped parts of HPLC chromatogram of dA<sub>10</sub>-dT<sub>10</sub> and 3×HCl after 1 h irradiation at 300 nm (8 lamps).

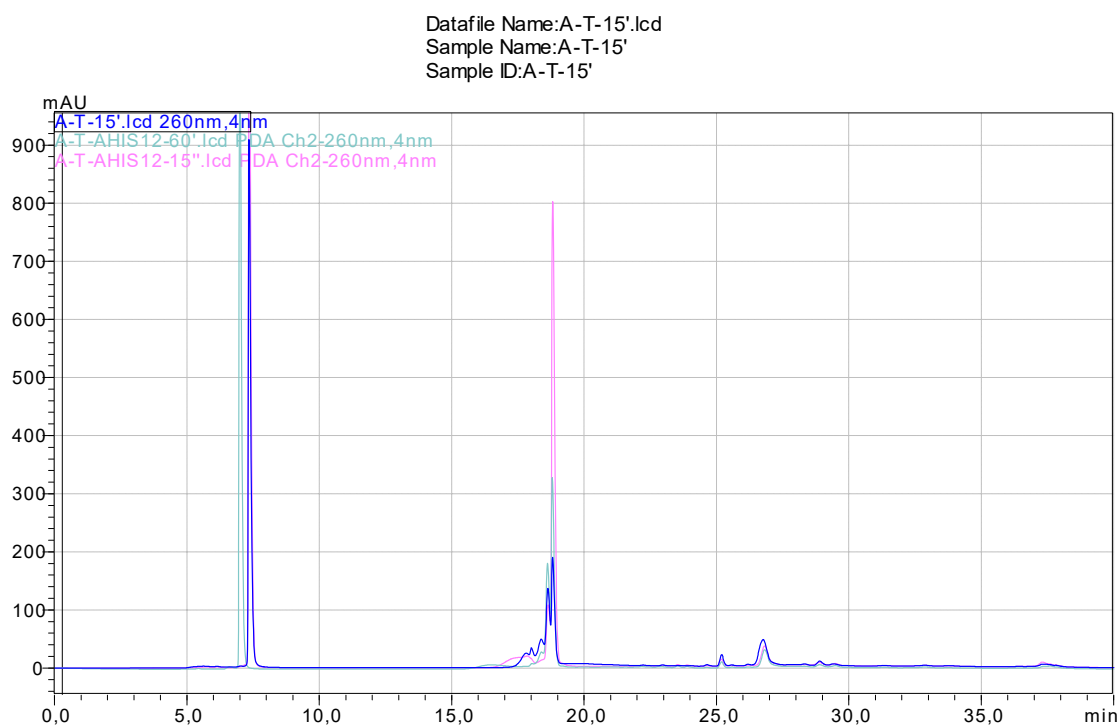

Fig. S74. Overlapped HPLC chromatogram of dA<sub>10</sub>-dT<sub>10</sub> and 3×HCl after 15 min and 1 h irradiation at 300 nm (8 lamps).

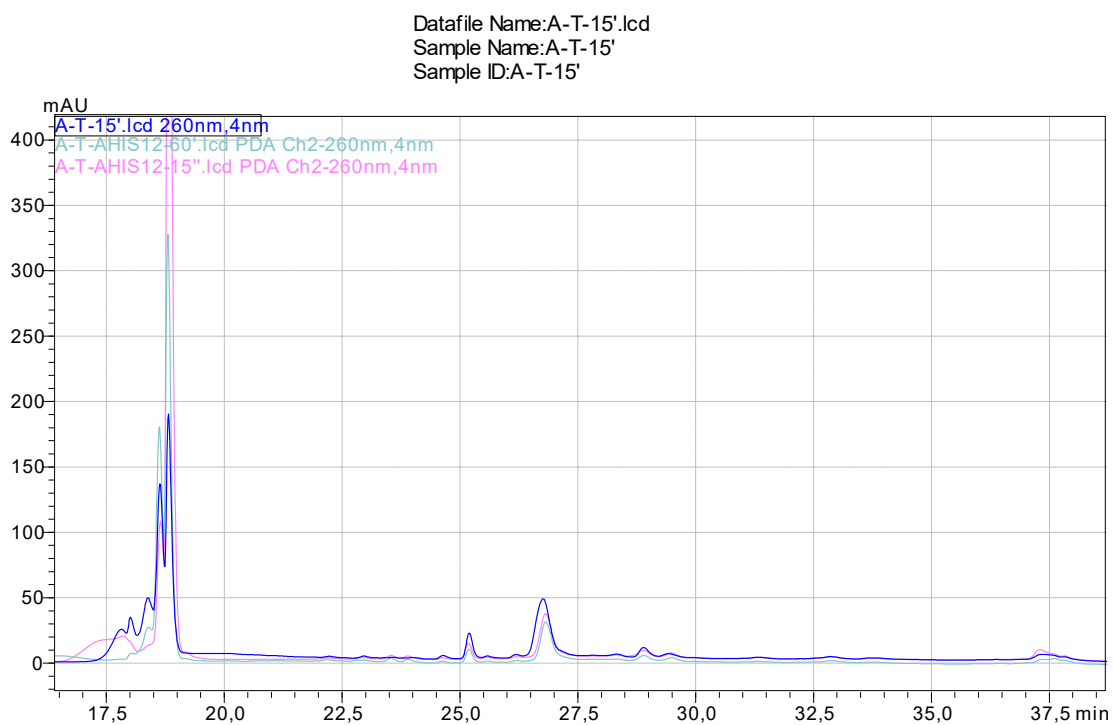

Fig. S75. Overlapped parts of HPLC chromatogram of dA<sub>10</sub>-dT<sub>10</sub> and 3×HCl after 15 min and 1 h irradiation at 300 nm (8 lamps).

## 5. NMR spectra

$^1\text{H}$  NMR ( $\text{CD}_3\text{OD}$ , 300 MHz) of *N*-Boc-L-Trp-OSu

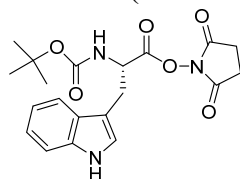

SpinWorks 4: A. Husak AH-079

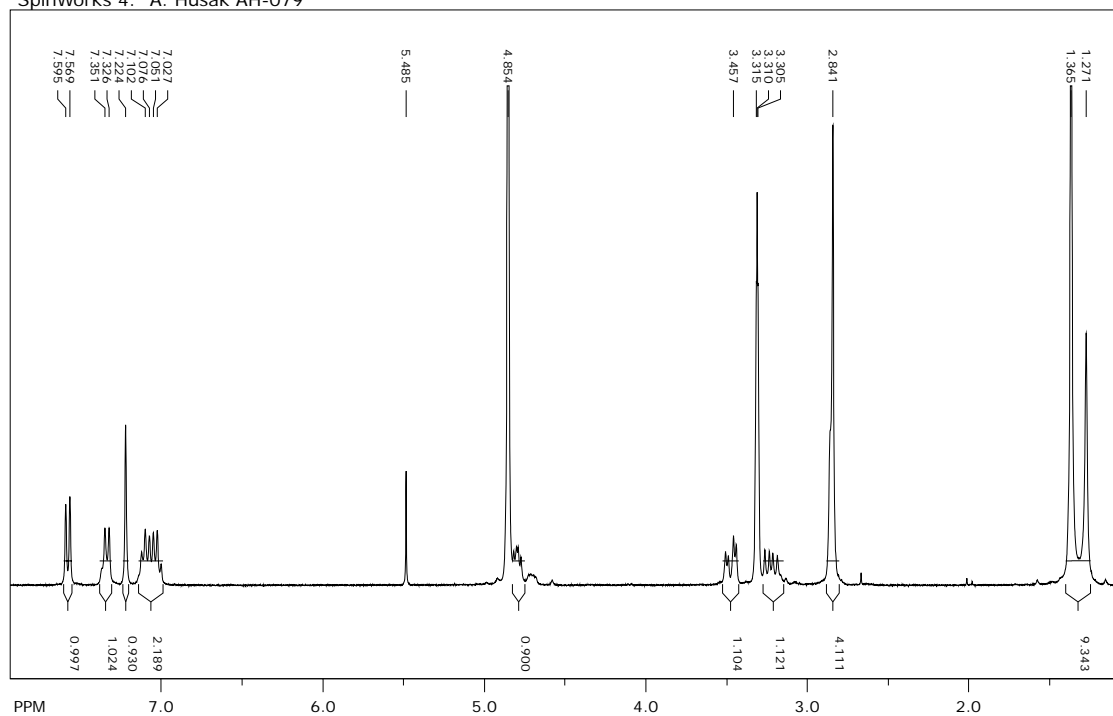

file: ...ktri\Spekttri-ESFVAH079\spectrum.dx expt: <zg30>  
transmitter freq.: 300.132701 MHz  
time domain size: 32768 points  
width: 6172.84 Hz = 20.5670 ppm = 0.188380 Hz/pt  
number of scans: 0

freq. of 0 ppm: 300.130005 MHz  
processed size: 32768 complex points  
LB: 0.000 GF: 0.0000

$^1\text{H}$  NMR ( $\text{CD}_3\text{OD}$ , 300 MHz) of *N*-**Boc**-L-Trp-L-Trp-OH

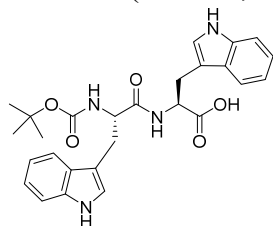

SpinWorks 4: A. Husak AH-052 I F-60-80

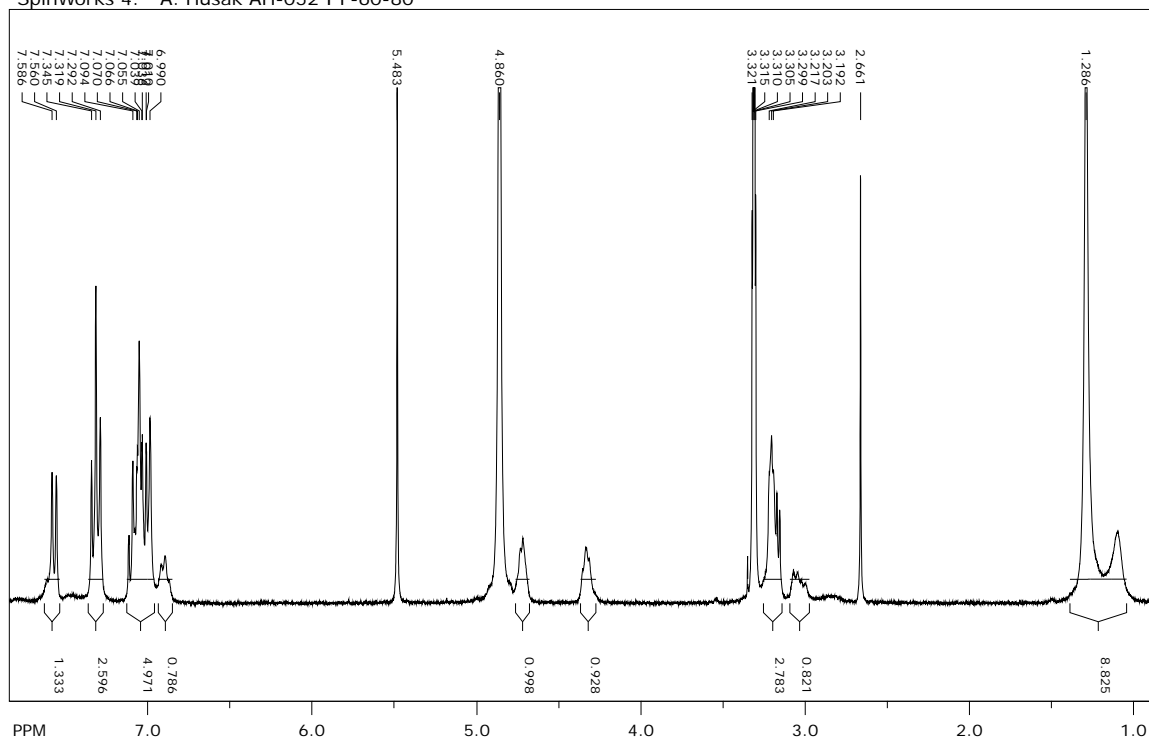

file: ...\\AH052\\AH052 I F-60-80\\spectrum.dx expt: <zg30>  
 transmitter freq.: 300.132701 MHz  
 time domain size: 32768 points  
 width: 6172.84 Hz = 20.5670 ppm = 0.188380 Hz/pt  
 number of scans: 0

freq. of 0 ppm: 300.130005 MHz  
 processed size: 32768 complex points  
 LB: 0.000 GF: 0.0000

<sup>1</sup>H NMR (CD<sub>3</sub>OD, 300 MHz) of *N*-Boc-L-Trp-L-Trp-OSu

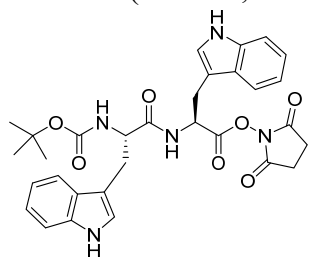

SpinWorks 4: A. Husak AH-030

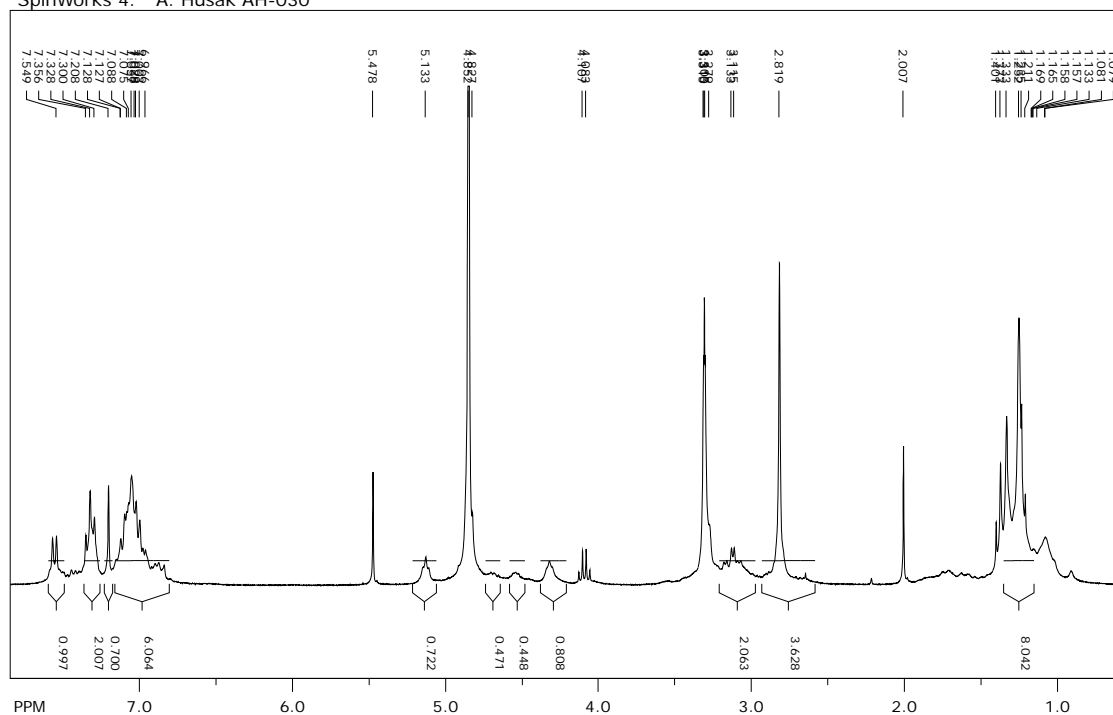

file: ...ktri\Spektri-ESF\AH030\spectrum.dx expt: <zg30>  
 transmitter freq.: 300.132701 MHz  
 time domain size: 32768 points  
 width: 6172.84 Hz = 20.5670 ppm = 0.188380 Hz/pt  
 number of scans: 0

freq. of 0 ppm: 300.130006 MHz  
 processed size: 32768 complex points  
 LB: 0.000 GF: 0.0000



<sup>1</sup>H NMR (CD<sub>3</sub>OD, 300 MHz) of **Boc-L-Trp-L-Trp-L-Phe-OBn** (**1**)

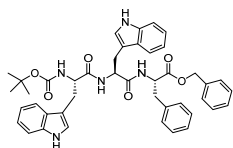

SpinWorks 4: A. Husak AH-085 II F-7-10

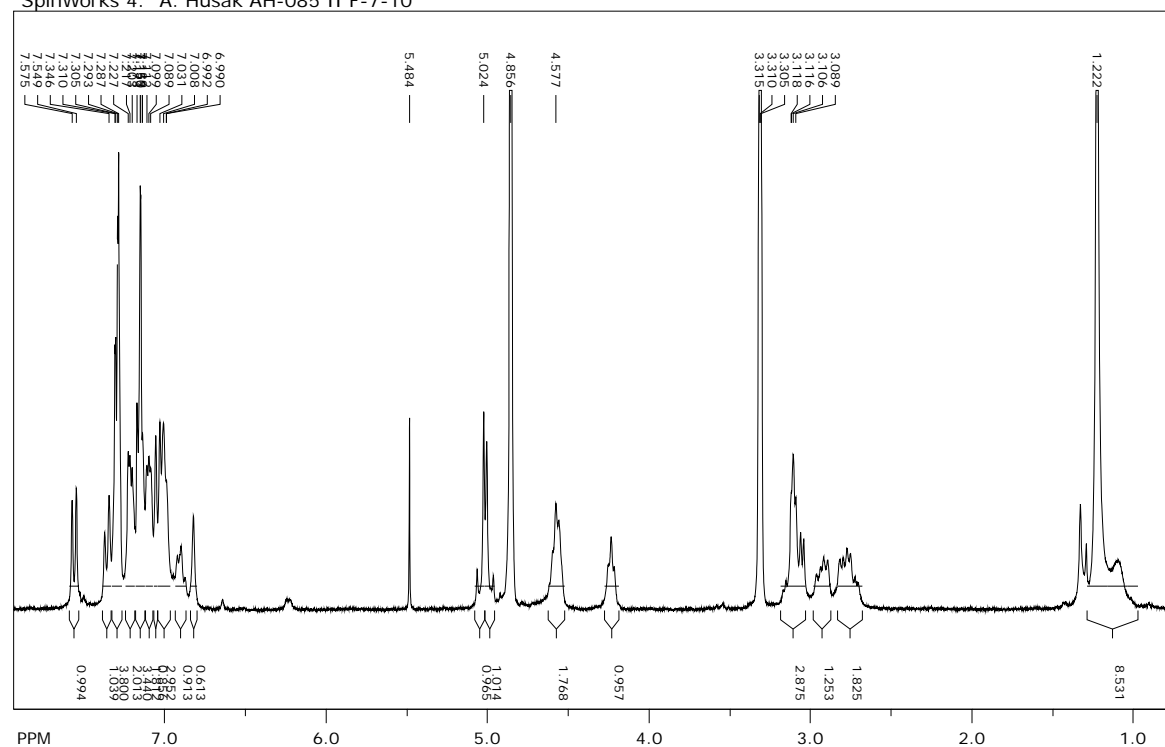

file: ...\\AH085\\AH085 II F-7-10\\spectrum.dx expt: <zg30>  
 transmitter freq.: 300.132701 MHz  
 time domain size: 32768 points  
 width: 6172.84 Hz = 20.5670 ppm = 0.188380 Hz/pt  
 number of scans: 0

freq. of 0 ppm: 300.130005 MHz  
 processed size: 32768 complex points  
 LB: 0.000 GF: 0.0000

$^1\text{H}$  NMR ( $\text{CD}_3\text{OD}$ , 300 MHz) of  $\text{HCl} \times \text{H-L-Trp-L-Trp-L-Phe-OBn}$  ( $1 \times \text{HCl}$ )

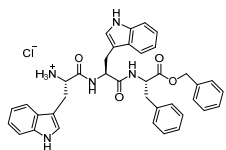

SpinWorks 4: AH-188P

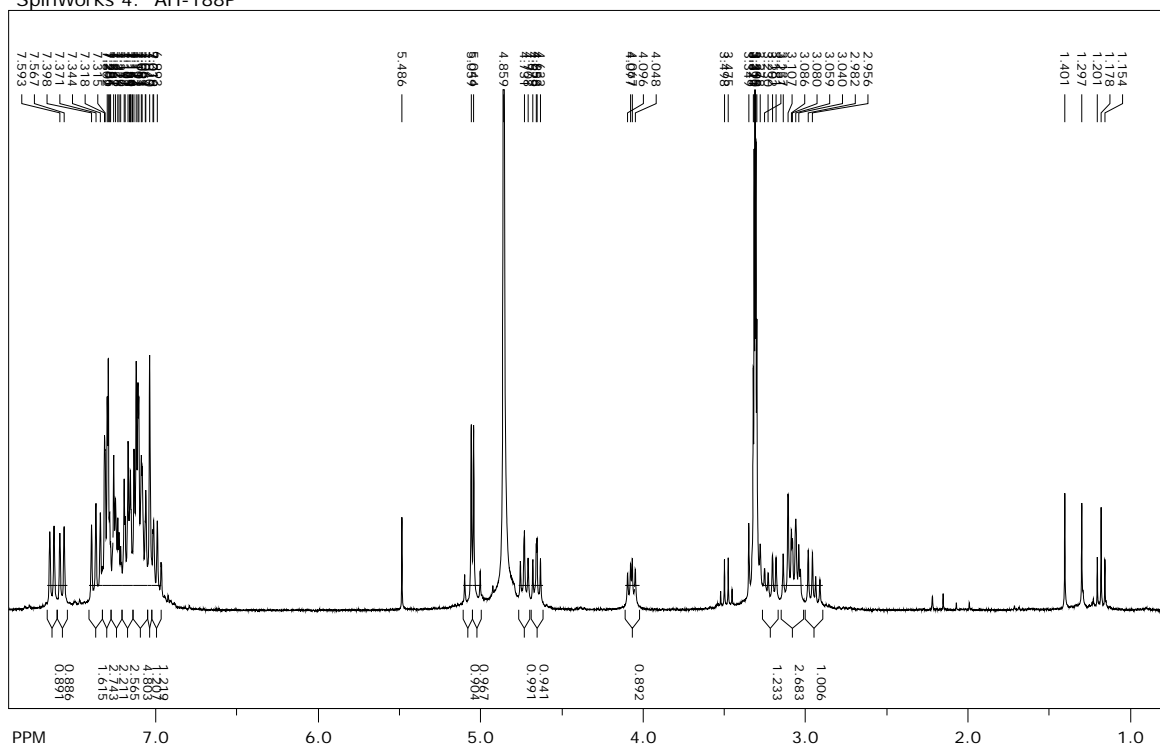

file: ...Desktop\husak\_ah188p1\spectrum.dx exp: <zg30>  
transmitter freq.: 300.132701 MHz  
time domain size: 32768 points  
width: 6172.84 Hz = 20.5670 ppm = 0.188380 Hz/pt  
number of scans: 0

freq. of 0 ppm: 300.130005 MHz  
processed size: 32768 complex points  
LB: 0.000 GF: 0.0000

<sup>1</sup>H NMR (CD<sub>3</sub>OD, 300 MHz) of **Boc-L-Trp-L-Trp-L-Tyr-OBn (2)**

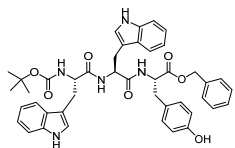

SpinWorks 4: A. Husak AH-078 III F-4

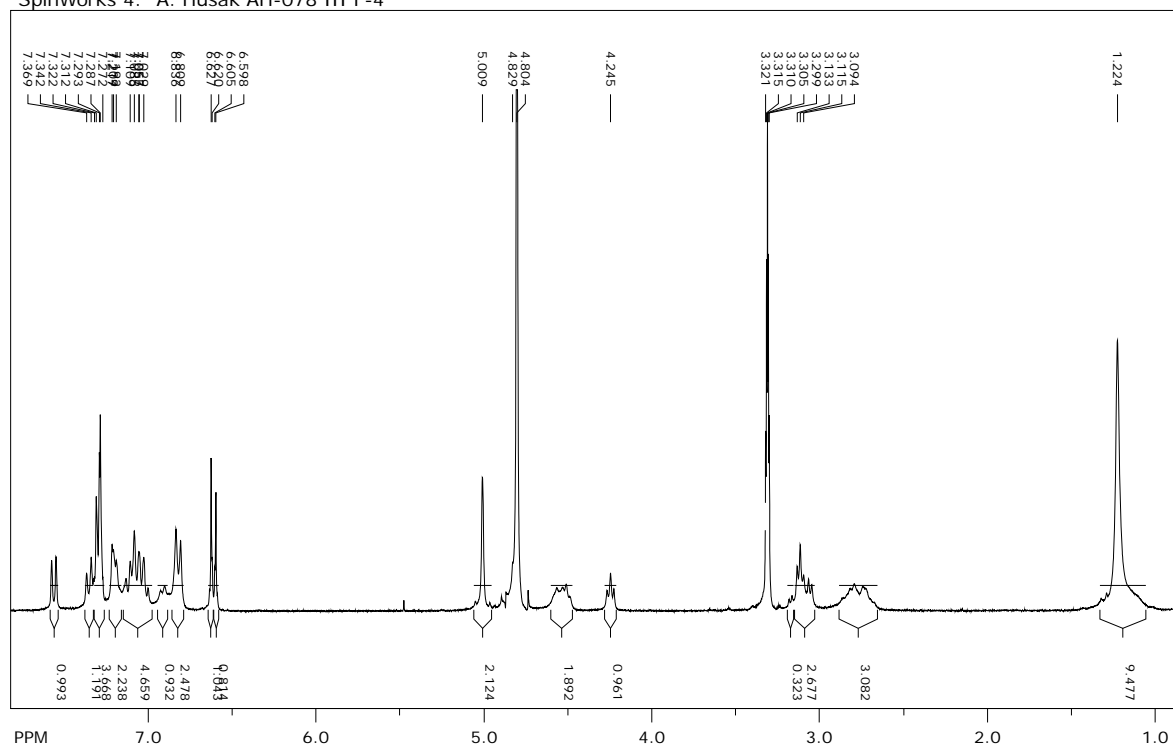

file: ...spektri\AH078 III F-4\spectrum.dx exp: <zg30>  
 transmitter freq.: 300.132701 MHz  
 time domain size: 32768 points  
 width: 6172.84 Hz = 20.5670 ppm = 0.188380 Hz/pt  
 number of scans: 0

freq. of 0 ppm: 300.130005 MHz  
 processed size: 32768 complex points  
 LB: 0.000 GF: 0.0000

$^1\text{H}$  NMR ( $\text{CD}_3\text{OD}$ , 300 MHz) of  $\text{HCl} \times \text{H-L-Trp-L-Trp-L-Tyr-OBn}$  ( $2 \times \text{HCl}$ )

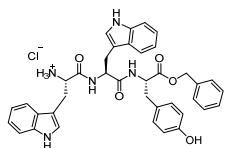

SpinWorks 4: AH-189IIA

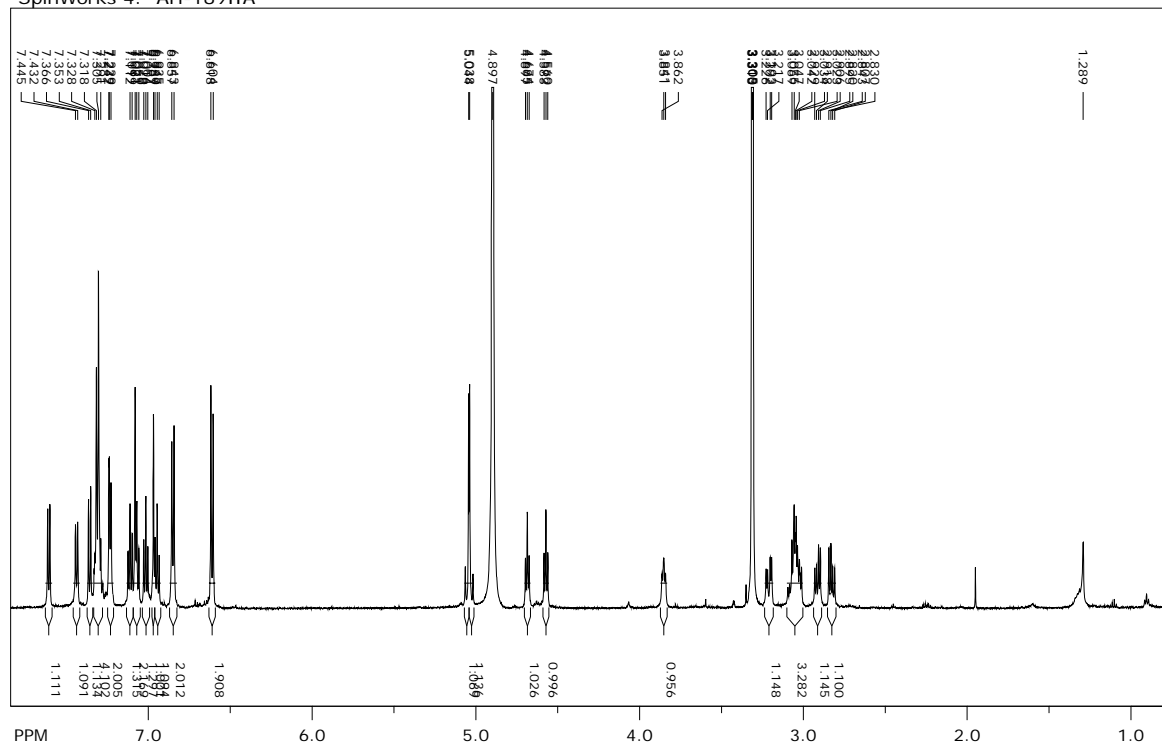

file: ...sktop\husak\_ah189IIA\1\spectrum.dx expt: <zg30>  
transmitter freq.: 600.135401 MHz  
time domain size: 32768 points  
width: 12019.23 Hz = 20.0275 ppm = 0.366798 Hz/pt  
number of scans: 0

freq. of 0 ppm: 600.130007 MHz  
processed size: 32768 complex points  
LB: 0.000 GF: 0.0000

$^1\text{H}$  NMR ( $\text{CD}_3\text{OD}$ , 300 MHz) of *N*-Boc-L-Tyr[ $\text{CH}_2\text{N}(\text{CH}_3)_2$ ]-OBn

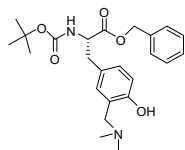

SpinWorks 4: AH040 I F-1-3

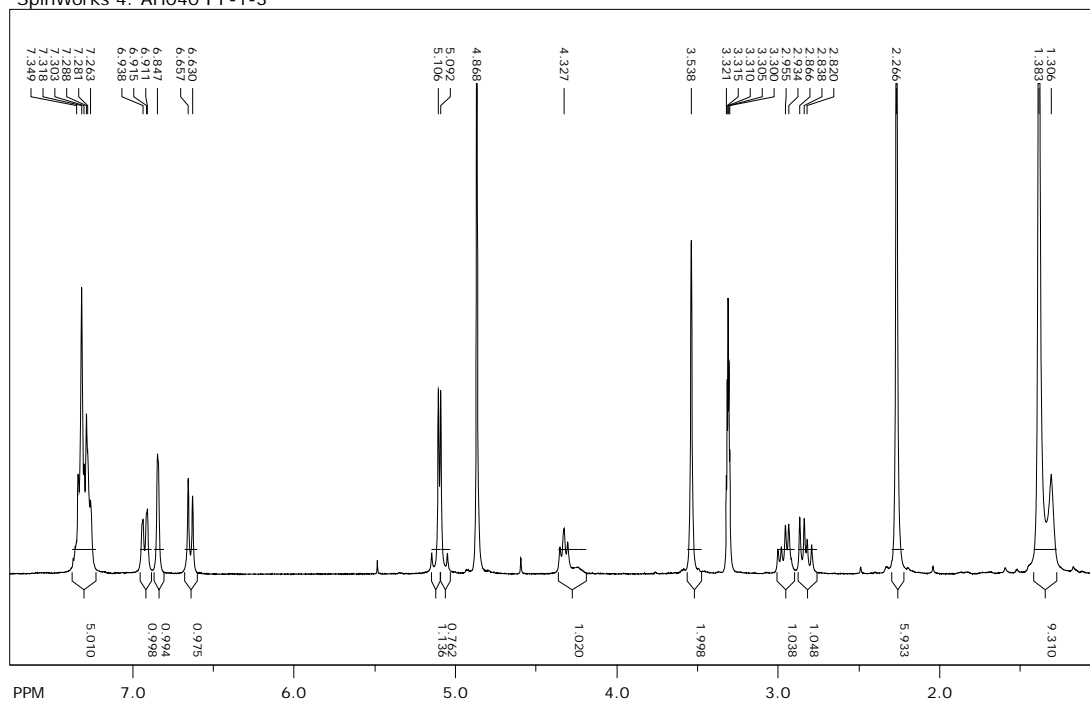

file: ...teza\BocTyr(Man)OBn\1H\spectrum.dx expt: <zg30>  
 transmitter freq.: 300.132701 MHz  
 time domain size: 32768 points  
 width: 6172.84 Hz = 20.5670 ppm = 0.188380 Hz/pt  
 number of scans: 0

freq. of 0 ppm: 300.130005 MHz  
 processed size: 32768 complex points  
 LB: 0.000 GF: 0.0000

$^1\text{H}$  NMR ( $\text{CD}_3\text{OD}$ , 300 MHz) of  $\text{TFA} \times \text{H-Tyr}[\text{CH}_2\text{N}(\text{CH}_3)_2 \times \text{TFA}] \cdot \text{OBn}$

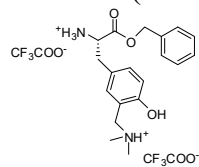

SpinWorks 4: A. Husak AH-013

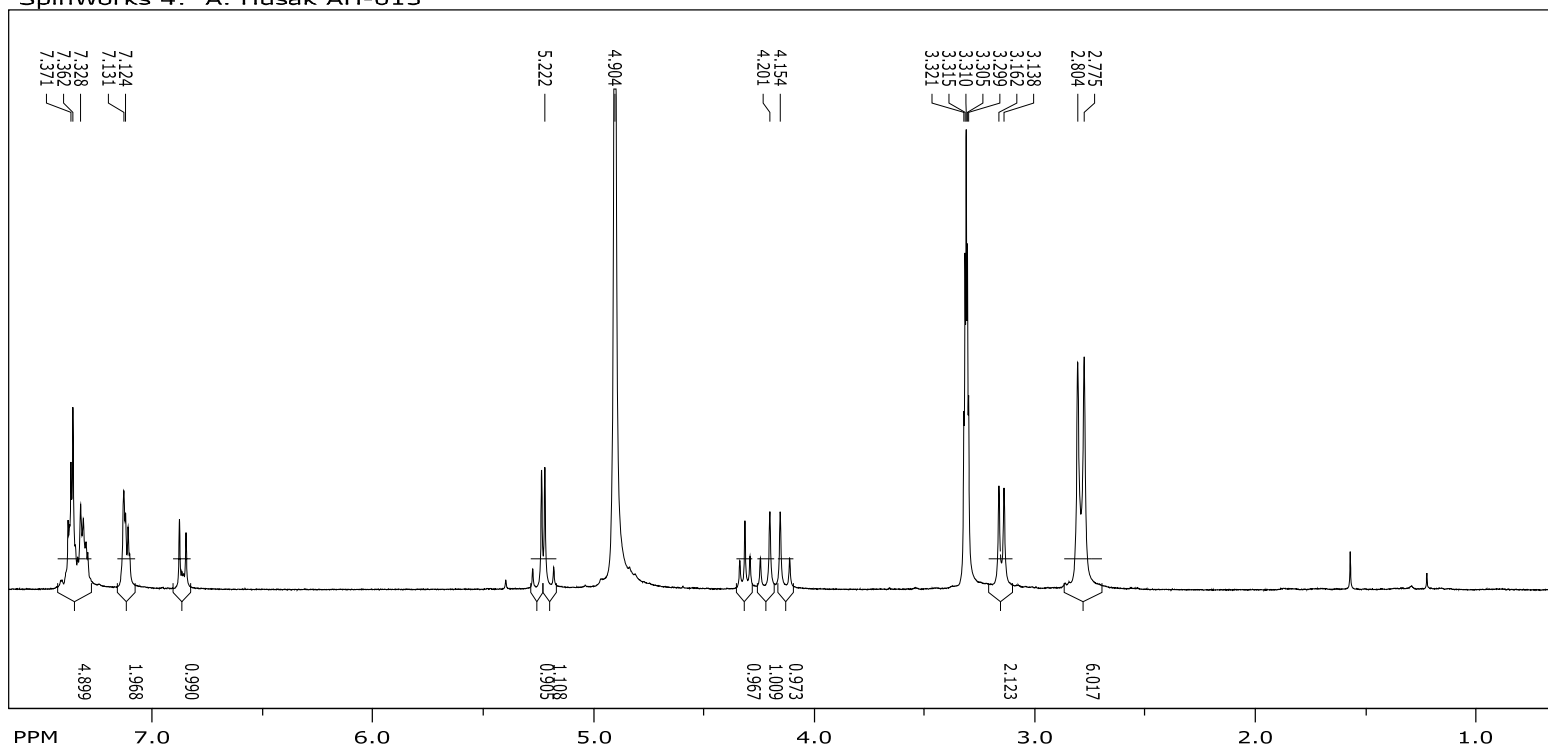

file: G:\Spektri\Rad\AH013\spectrum.dx expt: <zg30>  
 transmitter freq.: 300.132701 MHz  
 time domain size: 32768 points  
 width: 6172.84 Hz = 20.5670 ppm = 0.188380 Hz/pt  
 number of scans: 0

freq. of 0 ppm: 300.130005 MHz  
 processed size: 32768 complex points  
 LB: 0.000 GF: 0.0000

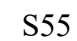

CC(C)(C)OC(=O)NC(=O)N[C@@H](Cc1c[nH]c2ccccc12)C(=O)N[C@@H](Cc1ccc(cc1)[C@H]2CN(C)CC2O)C(=O)OCc3ccccc3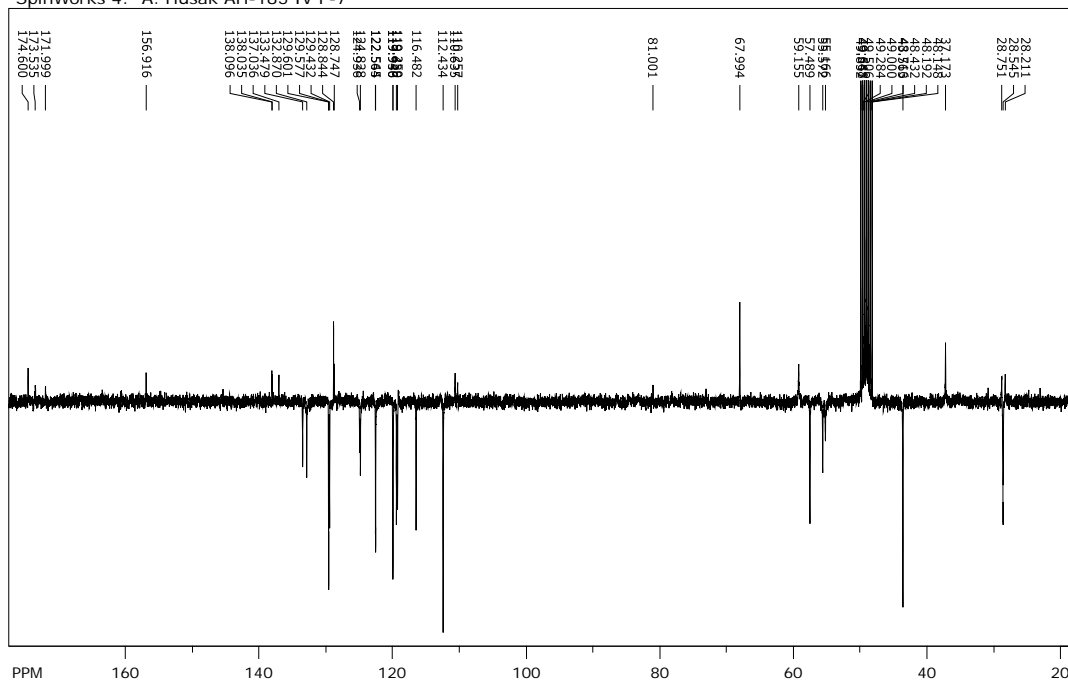

freq. of 0 ppm: 75.467642 MHz  
processed size: 32768 complex points  
LB: 0.000 GF: 0.0000



<sup>1</sup>H NMR (CD<sub>3</sub>OD, 600 MHz) of *N*-Boc-L-Trp-L-Trp-L-Tyr[CH<sub>2</sub>OCH<sub>3</sub>]-OBn (3-OMe)

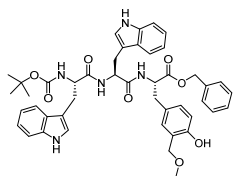

SpinWorks 4: AH-191A

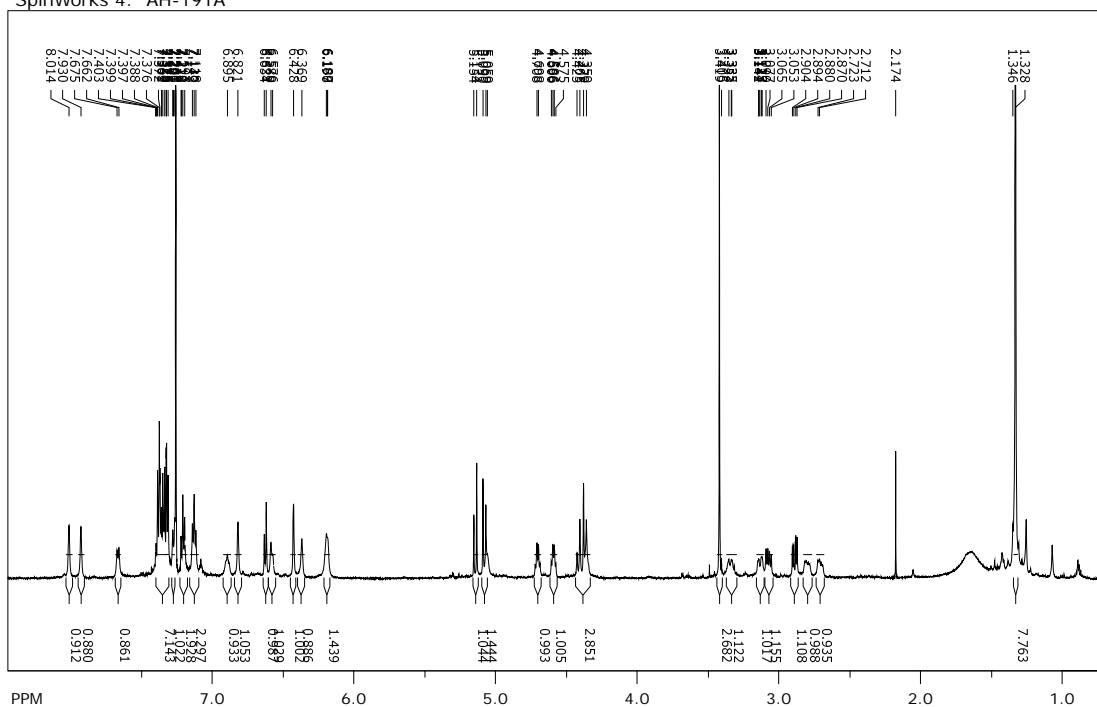

file: ...\\Spektri Tonka\\AH191 A\\spectrum.dx expt: <zg30>  
 transmitter freq.: 600.135401 MHz  
 time domain size: 32768 points  
 width: 12019.23 Hz = 20.0275 ppm = 0.366798 Hz/pt  
 number of scans: 0

freq. of 0 ppm: 600.130010 MHz  
 processed size: 32768 complex points  
 LB: 0.000 GF: 0.0000

<sup>13</sup>C NMR (CD<sub>3</sub>OD, 75 MHz, APT) of *N*-Boc-L-Trp-L-Trp-L-Tyr[CH<sub>2</sub>OCH<sub>3</sub>]-OBn (3-OMe)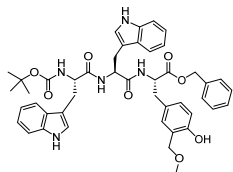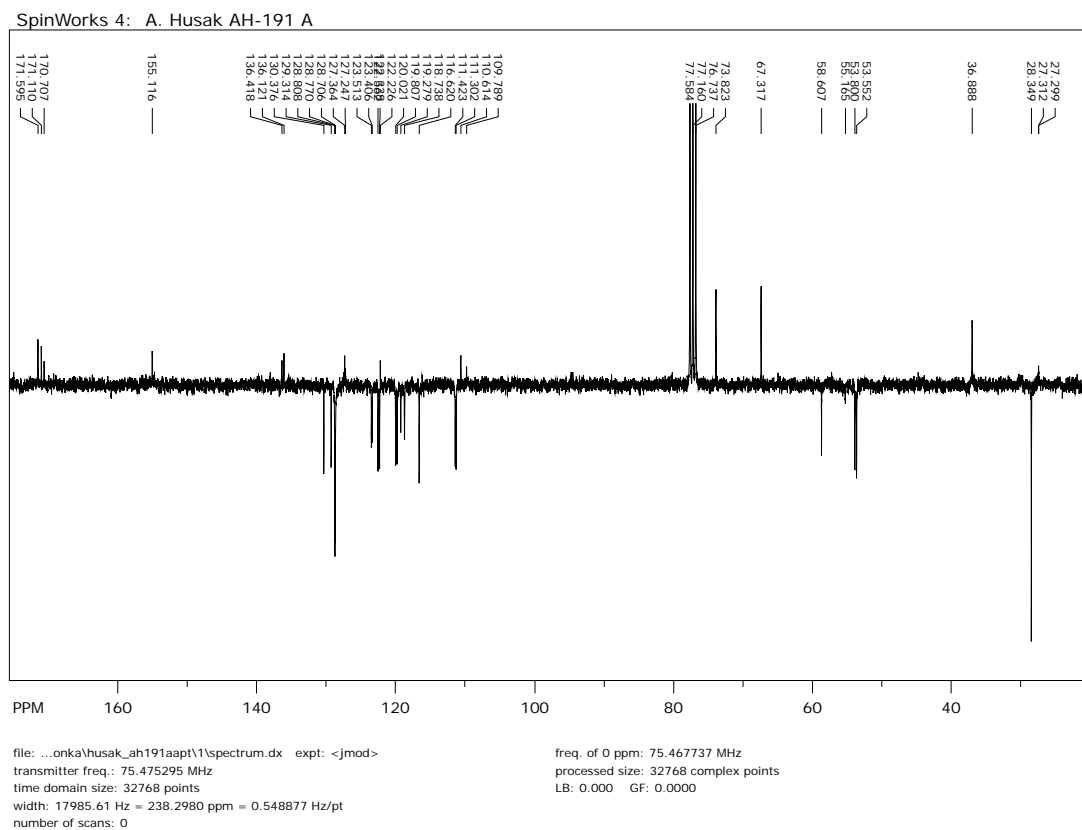

$^1\text{H}$  NMR ( $\text{CD}_3\text{OD}$ , 300 MHz) of  $\text{HCl} \times \text{H-L-Trp-L-Trp-L-Tyr}[\text{CH}_2\text{N}(\text{CH}_3)_2]\text{-OBn}$  ( $3 \times \text{HCl}$ )

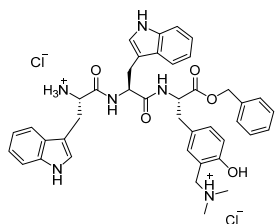

SpinWorks 4: Husak AH-127-A

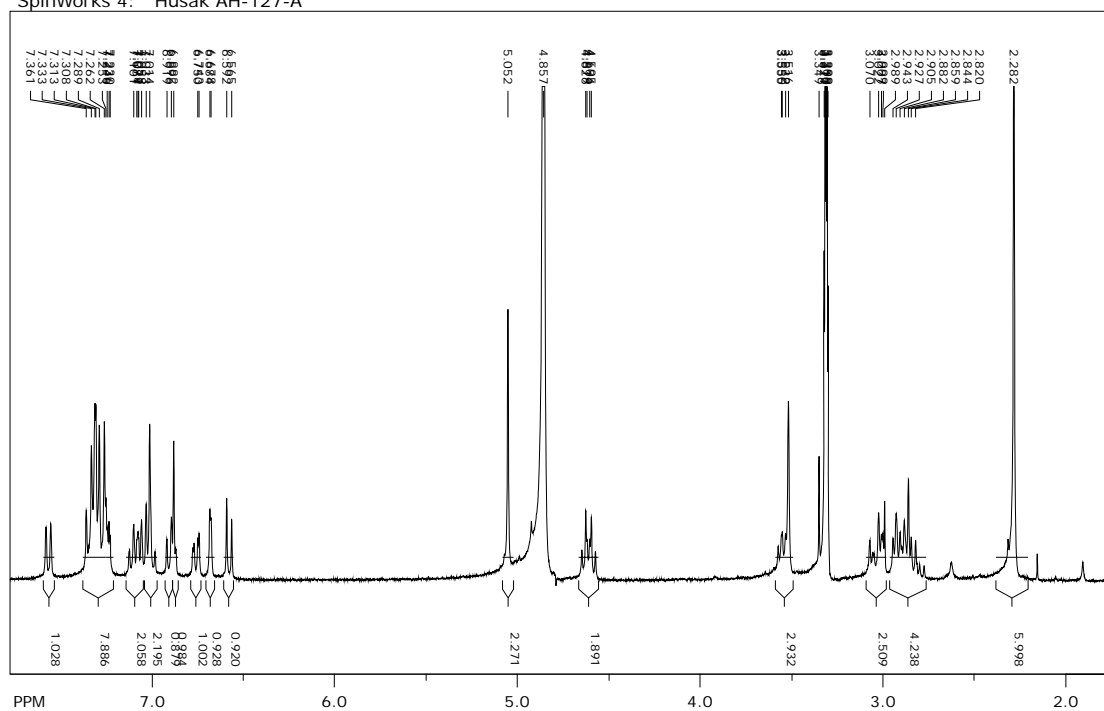

file: ...o po2ara\AH127\AH127-A\spectrum.dx exp: <zg30>  
transmitter freq.: 300.132701 MHz  
time domain size: 32768 points  
width: 6172.84 Hz = 20.5670 ppm = 0.188380 Hz/pt  
number of scans: 0

freq. of 0 ppm: 300.130005 MHz  
processed size: 32768 complex points  
LB: 0.000 GF: 0.0000

$^{13}\text{C}$  NMR ( $\text{CD}_3\text{OD}$ , 150 MHz) of  $\text{HCl} \times \text{H-L-Trp-L-Trp-L-Tyr}[\text{CH}_2\text{N}(\text{CH}_3)_2]\text{-OBn}$  ( $3 \times \text{HCl}$ )

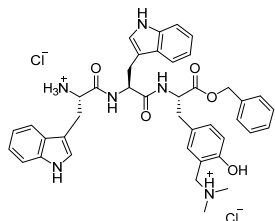

SpinWorks 4: A. Husak AH-127-A

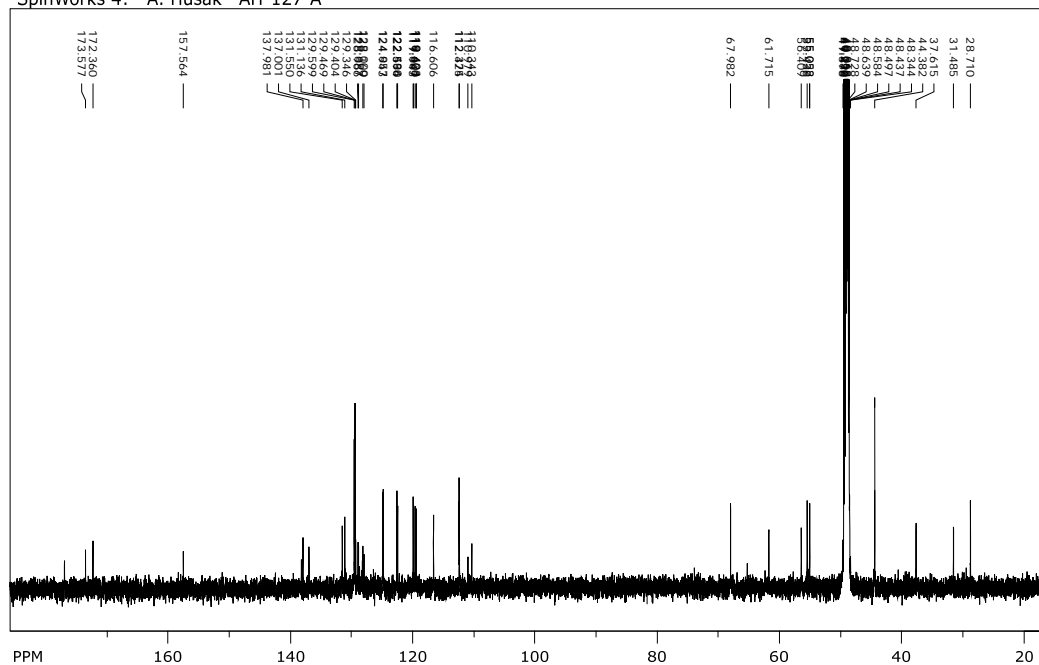

file: ...zara\husak\_ah127ac13\2\spectrum.dx expt: <zpgp30>  
transmitter freq.: 150.917899 MHz  
time domain size: 32768 points  
width: 35971.22 Hz = 238.3496 ppm = 1.097755 Hz/pt  
number of scans: 0

freq. of 0 ppm: 150.902594 MHz  
processed size: 32768 complex points  
LB: 0.000 GF: 0.0000

## References

---

- <sup>1</sup> Husak, A.; Noichl, B. P.; Šumanovac Ramljak, T.; Sohora, M.; Škalamera, Đ.; Budiša, N.; Basarić, N. Photochemical Formation of Quinone Methides from Peptides Containing Modified Tyrosine. *Org. Biomol. Chem.* **2016**, *14*, 10894-10905.
- <sup>2</sup> Kumar Mishra, N.; Ballabh Joshi, K.; Verma, S. Inhibition of Human and Bovine Insulin Fibril Formation by Designed Peptide Conjugates. *Mol. Pharmaceutics* **2013**, *10*, 3903-3912.
- <sup>3</sup> Chen, H.; Gao, P.; Zhang, M.; Liao, W.; Zhang, J. Synthesis and Biological Evaluation of a Novel Class of  $\beta$ -carboline Derivatives. *New J. Chem.* **2014**, *38*, 4155-4166.
- <sup>4</sup> Molar absorption coefficients and spectra obtained from <https://omlc.org/spectra/PhotochemCAD/html/091.html> and <https://omlc.org/spectra/PhotochemCAD/html/073.html>
- <sup>5</sup> Molar absorption coefficients and spectra obtained from <https://omlc.org/spectra/PhotochemCAD/html/092.html>.
- <sup>6</sup> Trinquet, E.; Mathis, G. Fluorescence Technologies for the Investigation of Chemical Libraries. *Mol. Bio Syst.* **2006**, *2*, 380-387.
